# Supplementary material for: The Growth and Survival of Mycobacterium smegmatis Is Enhanced by Co-Metabolism of Atmospheric H2
Source: PLoS One. 2014 Jul 24;9(7):e103034. doi: 10.1371/journal.pone.0103034 (PMC4109961; doi:10.1371/journal.pone.0103034)
Supplement: Dataset S1 — All genes with significant changes in expression ratios comparing Δ hyd 2 to WT. See excel file. (XLSX) [file pone.0103034.s010.xlsx]

## Sheet: non significant.txt
Original row	Locus	GeneN	Gene mean	Raw p value	Category
71	MSMEG_0077	hypothetical protein	2.29596	0.0031262	Conserved hypothetical
135	MSMEG_0141	transmembrane protein	2.00446	0.0460362	Conserved hypothetical
539	MSMEG_0549	alkane sulfonate ABC transporter, permease subunit	5.13414	0.0695231	Transport and binding proteins
540	MSMEG_0550	alkane sulfonate ABC transporter, substrate binding protein	5.32188	0.0552114	Transport and binding proteins
541	MSMEG_0551	alkane sulfonate ABC transporter, ATPase subunit	3.42393	0.0493629	Transport and binding proteins
749	MSMEG_0760	thioesterase family protein	2.29374	0.0249374	Fatty acid and phospholipid metabolism
830	MSMEG_0841	hypothetical protein, frameshifted	2.02767	0.0219801	Conserved hypothetical
1322	MSMEG_1394	transmembrane protein	2.08494	0.0493151	Hypothetical
1372	MSMEG_1442	ribosomal protein S3	3.28421	0.0456477	Transcription and translation
1584	MSMEG_1651	homoserine O-acetyltransferase	3.36085	0.0932154	Amino acid metabolism
1585	MSMEG_1652	O-acetylhomoserine aminocarboxypropyltransferase	3.5771	0.0471903	Amino acid metabolism
1586	MSMEG_1653	hypothetical protein	2.32175	0.0930774	Hypothetical
1587	MSMEG_1654	isocitrate dehydrogenase (NADP-dependent)	2.44003	0.201094	Organic acid and alcohol metabolism
2022	MSMEG_2092	D-aminopeptidase	2.21166	0.0463055	Protein fate
2252	MSMEG_2303	integral membrane transporter	3.32721	0.0248848	Transport and binding proteins
2253	MSMEG_2304	putative transporter	2.34974	0.0258937	Transport and binding proteins
2304	MSMEG_2332	amino acid carrier protein	3.13812	0.0173856	Transport and binding proteins
2593	MSMEG_2619	efflux protein	2.48021	0.0479236	Transport and binding proteins
3018	MSMEG_3034	metallopeptidase family protein	2.02661	0.0421071	Protein fate
3029	MSMEG_3045	integral membrane protein	2.87041	0.0395936	Transport and binding proteins
3040	MSMEG_3056	methionine ABC transporter, ATPase subunit	1.8104	0.0537593	Transport and binding proteins
3041	MSMEG_3057	methionine ABC transporter, permease subunit	2.45651	0.126787	Transport and binding proteins
3042	MSMEG_3058	methionine ABC transporter, substrate binding protein	2.27988	0.141332	Transport and binding proteins
3043	MSMEG_3058	lipoprotein, nlpa family protein	3.77116	0.0475113	Transport and binding proteins
3144	MSMEG_3158	methylmalonyl-CoA mutase, small subunit	2.80137	0.0322807	Organic acid and alcohol metabolism
3145	MSMEG_3159	methylmalonyl-CoA mutase large subunit	2.43066	0.0136487	Organic acid and alcohol metabolism
3178	MSMEG_3194	biotin synthase	2.70956	0.00951579	Cofactor, prosthetic group, and carrier biosynthesis
3230	MSMEG_3247	branched-chain amino acid ABC transporter, substrate binding protein	2.62389	0.168825	Transport and binding proteins
3231	MSMEG_3248	branched-chain amino acid ABC transporter, permease subunit	2.23414	0.0461159	Transport and binding proteins
3232	MSMEG_3249	branched-chain amino acid ABC transporter, permease subunit	2.97803	0.0332188	Transport and binding proteins
3233	MSMEG_3250	branched-chain amino acid ABC transporter, ATPase subunit	2.4886	0.0648992	Transport and binding proteins
3234	MSMEG_3251	branched-chain amino acid ABC transporter, ATPase subunit	2.24022	0.256012	Transport and binding proteins
3749	MSMEG_3769	argininosuccinate lyase	3.0441	0.0327887	Amino acid metabolism
3750	MSMEG_3770	argininosuccinate synthase	2.0012	0.0138635	Amino acid metabolism
3752	MSMEG_3772	ornithine carbamoyltransferase	2.58107	0.0367249	Amino acid metabolism
3753	MSMEG_3773	acetylornithine aminotransferase	2.16847	0.0294846	Amino acid metabolism
3758	MSMEG_3778	phenylalanyl-tRNA synthetase, alpha subunit	2.18777	0.0124238	Transcription and translation
3943	MSMEG_3962	lactate 2-monooxygenase	7.63896	0.166119	Organic acid and alcohol metabolism
3945	MSMEG_3964	pyruvate dehydrogenase	2.01634	0.0201783	Organic acid and alcohol metabolism
3947	MSMEG_3966	hypothetical protein	3.86042	0.0266648	Hypothetical
4509	MSMEG_4530	sulfate ABC transporter, ATP-binding protein	3.87664	0.080775	Transport and binding proteins
4510	MSMEG_4531	sulfate ABC transporter, permease subunit	5.42416	0.00415341	Transport and binding proteins
4511	MSMEG_4532	sulfate ABC transporter, permease subunit	4.68898	0.0986563	Transport and binding proteins
4512	MSMEG_4533	sulfate ABC transporter, substrate binding protein	5.9903	0.137436	Transport and binding proteins
4535	MSMEG_4557	cobalamin / Fe(III) siderophore ABC transporter, ATPase subunit	3.80582	0.260801	Transport and binding proteins
4537	MSMEG_4559	cobalamin / Fe(III) siderophore ABC transporter, permease subunit	2.31019	0.0686116	Transport and binding proteins
4538	MSMEG_4560	cobalamin / Fe(III) siderophore ABC transporter, substrate binding protein	2.57596	0.0883291	Transport and binding proteins
4539	MSMEG_4561	cobalamin / Fe(III) siderophore ABC transporter, substrate binding protein	3.07999	0.0446608	Transport and binding proteins
4628	MSMEG_4645	ketoglutarate-ferredoxin oxidoreductase, beta subunit	1.76273	0.0842998	Organic acid and alcohol metabolism
4629	MSMEG_4646	ketoglutarate-ferredoxin oxidoreductase, alpha subunit	2.32281	0.0656642	Organic acid and alcohol metabolism
4657	MSMEG_4674	trigger factor	2.71702	0.0482014	Transcription and translation
4950	MSMEG_4976	isochorismatase	2.19448	0.0291793	Cofactor, prosthetic group, and carrier biosynthesis
5033	MSMEG_5058	trehalose ABC transporter, ATPase subunit	2.53394	0.0252423	Transport and binding proteins
5034	MSMEG_5059	trehalose ABC transporter, permease subunit	2.97627	0.0335637	Transport and binding proteins
5035	MSMEG_5060	trehalose ABC transporter, permease subunit	2.06733	0.0428242	Transport and binding proteins
5036	MSMEG_5061	trehalose ABC transporter, substrate binding protein	2.07936	0.0463086	Transport and binding proteins
5215	MSMEG_5242	diacylglycerol acyltransferase	5.7934	0.111783	Fatty acid and phospholipid metabolism
5299	MSMEG_5325	hypothetical protein	2.13573	0.0335373	Hypothetical
5402	MSMEG_5431	ribosomal protein L25, Ctc-form	2.88595	0.0387879	Transcription and translation
5902	MSMEG_5939	acetaldehyde dehydrogenase	2.12029	0.0274335	Organic acid and alcohol metabolism
5904	MSMEG_5941	3-ketosteroid dehydrogenase	2.0256	0.0324198	Fatty acid and phospholipid metabolism
6227	MSMEG_6267	thiocyanate hydrolase, gamma subunit	2.16809	0.0038409	General metabolism
6340	MSMEG_6384	catalase / peroxidase HPI	3.03208	0.0189651	General metabolism
6347	MSMEG_6391	propionyl-CoA carboxylase, beta chain	2.40655	0.0491164	Organic acid and alcohol metabolism
6369	MSMEG_6413	seryl-tRNA synthetase	2.85974	0.0146859	Transcription and translation
6414	MSMEG_6458	glutamate synthase (NAD-dependent), small subunit	2.96586	0.0316718	Amino acid metabolism
6415	MSMEG_6459	glutamate synthase (NAD-dependent), large subunit	2.89327	0.0459092	Amino acid metabolism
6605	MSMEG_6649	conserved hypothetical protein	2.56761	0.0294878	Conserved hypothetical
6707	MSMEG_6752	endoglucanase	2.75652	0.0472831	General metabolism
166	MSMEG_0172	transmembrane protein	0.463784	0.0237342	Conserved hypothetical
574	MSMEG_0584	hypothetical protein	0.430924	0.0363133	Hypothetical
731	MSMEG_0742	LysR family transcriptional regulator	0.409517	0.0287019	Regulatory functions
800	MSMEG_0811	monooxygenase	0.274089	0.0448113	General metabolism
876	MSMEG_0887	conserved hypothetical protein	0.473639	0.0442233	Conserved hypothetical
968	MSMEG_0979	Hypothetical protein	0.226211	0.0269085	Hypothetical
1138	MSMEG_1203	methoxy-mycolic acid synthase	0.400034	0.0462344	Cell envelope
1223	MSMEG_1291	Xanthine dehydrogenase	0.48381	0.0412554	Nucleic acid metabolism
1224	MSMEG_1292	Xanthine dehydrogenase	0.530229	0.0699179	Nucleic acid metabolism
1405	MSMEG_1475	monooxygenase	0.293431	0.0102529	General metabolism
1409	MSMEG_1479	radical SAM methyltransferase	0.382786	0.0227143	General metabolism
1410	MSMEG_1480	radical SAM methyltransferase	0.356385	0.0327003	General metabolism
1418	MSMEG_1488	acetolactate synthase	0.290674	0.0686568	Amino acid metabolism
1420	MSMEG_1490	3-oxoacyl-ACP synthase III	0.252648	0.0520057	Fatty acid and phospholipid metabolism
1421	MSMEG_1491	histidinol-phosphate aminotransferase 2	0.241379	0.0427147	Amino acid metabolism
1422	MSMEG_1492	MarR family transcriptional regulator	0.273056	0.0115997	Regulatory functions
1928	MSMEG_1996	F420-dependent oxidoreductase	0.450889	0.0193042	General metabolism
2050	MSMEG_2121	multiphosphoryl transfer protein (MTP)	0.464223	0.020484	Organic acid and alcohol metabolism
2051	MSMEG_2122	dihydroxyacetone kinase, L subunit	0.486151	0.0399311	Organic acid and alcohol metabolism
2052	MSMEG_2123	dihydroxyacetone kinase, DhaK subunit	0.475699	0.0334991	Organic acid and alcohol metabolism
2091	MSMEG_2161	Fatty acid CoA-ligase, frameshifted	0.154447	0.00751084	Fatty acid and phospholipid metabolism
2187	MSMEG_2254	oxalate decarboxylase OxdC, putative	0.421618	0.0255149	Organic acid and alcohol metabolism
2261	MSMEG_2310	Monooxygenase	0.461986	0.0301254	General metabolism
2722	MSMEG_2747	transposase	0.454437	0.0109932	Mobile and extrachromosomal element functions
2789	MSMEG_2809	conserved hypothetical protein	0.47503	0.0091602	Cofactor, prosthetic group, and carrier biosynthesis
3304	MSMEG_3320	LysR family transcriptional regulator, frameshifted	0.479801	0.0138936	Regulatory functions
3305	MSMEG_3321	Carnitine transferase	0.489472	0.0483565	Fatty acid and phospholipid metabolism
3310	MSMEG_3326	carboxylate-amine ligase	0.479755	0.0327686	Amino acid metabolism
3427	MSMEG_3442	cyclohexadienyl dehydratase	0.455476	0.0185843	Amino acid metabolism
3470	MSMEG_3485	Extracellular function sigma factor (RpoE1)	0.277804	0.0442471	Regulatory functions
3651	MSMEG_3667	para-nitrobenzyl esterase	0.476674	0.0292924	Cofactor, prosthetic group, and carrier biosynthesis
3688	MSMEG_3706	isocitrate lyase	0.380341	0.0382445	Organic acid and alcohol metabolism
3777	MSMEG_3797	putative esterase family protein	0.356157	0.0301728	Cofactor, prosthetic group, and carrier biosynthesis
4477	MSMEG_4499	hypothetical protein	0.343417	0.0370292	Hypothetical
4909	MSMEG_4932	UDP-N-acetylglucosamine 1-carboxyvinyltransferase	0.481207	0.000693491	Cell envelope
4935	MSMEG_4961	hypothetical protein	0.352586	0.0276485	Hypothetical
4947	MSMEG_4973	glyoxalase/bleomycin resistance protein/dioxygenase	0.472555	0.0480288	General metabolism
4960	MSMEG_4986	Glycosyltransferase	0.372682	0.00438503	General metabolism
4961	MSMEG_4987	Glycosyltransferase	0.371798	0.00286792	General metabolism
4963	MSMEG_4989	Sensor histidine kinase	0.439724	0.0122944	Regulatory functions
4964	MSMEG_4990	Response regulator	0.33293	0.0358856	Regulatory functions
4966	MSMEG_4992	hypothetical protein	0.471008	0.042858	Hypothetical
5137	MSMEG_5164	zinc-binding alcohol dehydrogenase family protein	0.386258	0.0407134	Organic acid and alcohol metabolism
5187	MSMEG_5215	conserved hypothetical protein	0.36824	0.0410858	Conserved hypothetical
5302	MSMEG_5328	dUTPase	0.455656	0.040905	Nucleic acid metabolism
5309	MSMEG_5334	oxidoreductase	0.315258	0.0460804	General metabolism
5339	MSMEG_5364	amidohydrolase 2	0.285829	0.0475157	Cofactor, prosthetic group, and carrier biosynthesis
5361	MSMEG_5389	diaminopimelate decarboxylase (LysA)	0.368691	0.0474375	Amino acid metabolism
5708	MSMEG_5739	Long-chain fatty-acid CoA ligase	0.249625	0.0435781	Fatty acid and phospholipid metabolism
6213	MSMEG_6253	Fur family transcriptional regulator	0.4834	0.0414644	Regulatory functions
6214	MSMEG_6254	hypothetical protein	0.328004	0.0141211	Hypothetical
6633	MSMEG_6676	Transmembrane protein	0.401097	0.0400999	Hypothetical
6694	MSMEG_6739	hypothetical protein	0.35175	0.0310466	Hypothetical
1	MSMEG_0001	DNA polymerase III, beta subunit	1.55901	0.0236107
2	MSMEG_0002	6-phosphogluconate dehydrogenase, decarboxylating	2.07025	0.187855
3	MSMEG_0003	DNA replication and repair protein RecF	0.839858	0.610521
4	MSMEG_0004	hypothetical protein	0.942772	0.503773
5	MSMEG_0005	DNA gyrase, B subunit	0.898389	0.472009
6	MSMEG_0006	DNA gyrase, A subunit	0.842165	0.110353
7	MSMEG_0007	conserved hypothetical protein	1.25698	0.494048
8	MSMEG_0009	hypothetical protein	1.097	0.796798
9	MSMEG_0011	FAD-binding 9, siderophore-interacting	0.8041	0.443713
10	MSMEG_0012	ferric enterobactin transport system permease protein FepD	1.24203	0.4644
11	MSMEG_0013	ferric enterobactin transport system permease protein FepG; this gene contains a frame shift which is not the result of sequencing error; identified by match to protein family HMM PF01032	0.875415	0.715543
12	MSMEG_0014	Formyl transferase	1.10021	0.877582
13	MSMEG_0015	ferric enterobactin transport ATP-binding protein FepC	1.11471	0.777353
14	MSMEG_0016	conserved domain protein	1.34939	0.59542
15	MSMEG_0017	ABC transporter, permease/ATP-binding protein	0.831273	0.390743
16	MSMEG_0018	ABC transporter, permease/ATP-binding protein	0.819297	0.312456
17	MSMEG_0019	amino acid adenylation	1.02761	0.943304
18	MSMEG_0020	Periplasmic binding protein	2.27384	0.247694
19	MSMEG_0021	aspartate 1-decarboxylase	1.40405	0.501817
20	MSMEG_0022	L-ornithine 5-monooxygenase	1.35599	0.384009
21	MSMEG_0023	conserved hypothetical protein	0.91204	0.619276
22	MSMEG_0024	peptidyl-prolyl cis-trans isomerase B	1.88521	0.326589
23	MSMEG_0025	conserved hypothetical protein	0.997765	0.978943
24	MSMEG_0026	putative membrane protein	0.685624	0.0571774
25	MSMEG_0027	conserved hypothetical protein	0.859966	0.416436
26	MSMEG_0028	serine-threonine protein kinase	1.63361	0.276594
27	MSMEG_0029	anthranilate synthase component 2	0.918066	0.555917
28	MSMEG_0030	serine/threonine protein kinase PknA	1.57867	0.224801
29	MSMEG_0031	Penicillin binding protein transpeptidase domain protein	1.24928	0.140562
30	MSMEG_0032	cell cycle protein, FtsW/RodA/SpoVE family protein	1.30677	0.190746
31	MSMEG_0033	protein phosphatase 2C	1.39714	0.132027
32	MSMEG_0034	FHA domain protein	1.20407	0.279704
33	MSMEG_0035	FHA domain protein	1.01386	0.947615
34	MSMEG_0036	hypothetical protein	0.844745	0.57965
35	MSMEG_0038	putative glucose-methanol-choline oxidoreductase; this region contains one or more premature stops and/or frameshifts which are not the result of sequencing error	1.14253	0.694098
36	MSMEG_0039	small membrane hydrophobic protein	1.02535	0.845247
37	MSMEG_0040	conserved hypothetical protein	1.45472	0.431663
38	MSMEG_0041	conserved hypothetical protein	1.0663	0.721827
39	MSMEG_0042	TetR-family protein transcriptional regulator	1.11198	0.55116
40	MSMEG_0043	extradiol ring-cleavage dioxygenase, class III enzyme, subunit B	0.685102	0.103258
41	MSMEG_0044	hypothetical protein	1.19437	0.739004
42	MSMEG_0045	hypothetical protein	1.65681	0.218278
43	MSMEG_0046	conserved hypothetical protein	3.30225	0.394979
44	MSMEG_0047	hypothetical protein	2.45762	0.132423
45	MSMEG_0048	pyridoxamine 5'-phosphate oxidase family protein	1.77706	0.216324
46	MSMEG_0049	pirin domain protein	1.16344	0.374461
47	MSMEG_0050	conserved hypothetical protein	1.20349	0.440041
48	MSMEG_0051	transcription factor WhiB family protein	1.9692	0.536356
49	MSMEG_0052	conserved hypothetical protein	1.49988	0.258196
50	MSMEG_0053	conserved hypothetical protein	1.32986	0.19941
51	MSMEG_0053	conserved hypothetical protein	1.47815	0.141362
52	MSMEG_0055	hypothetical protein	2.1245	0.222073
53	MSMEG_0056	hypothetical protein	1.29474	0.26073
54	MSMEG_0057	conserved hypothetical protein	1.56081	0.0703198
55	MSMEG_0058	conserved hypothetical protein	1.80553	0.141893
56	MSMEG_0059	ATPase, AAA family protein	2.54844	0.186465
57	MSMEG_0060	conserved hypothetical protein	1.76419	0.210454
58	MSMEG_0061	ftsk/spoiiie family protein	2.29959	0.136542
59	MSMEG_0062	ftsk/spoiiie family protein	1.21838	0.16697
60	MSMEG_0063	PE family protein	1.89077	0.117033
61	MSMEG_0064	ppe family protein	2.10491	0.132894
62	MSMEG_0065	conserved hypothetical protein	3.93657	0.202316
63	MSMEG_0066	early secretory antigenic target, 6 kDa	1.82635	0.231296
64	MSMEG_0067	conserved hypothetical protein	2.32075	0.101544
65	MSMEG_0068	probable conserved transmembrane protein	1.40437	0.225413
66	MSMEG_0069	translation initiation factor IF-2 protein	1.08505	0.704814
67	MSMEG_0070	hypothetical protein	1.02678	0.817903
68	MSMEG_0071	conserved hypothetical protein	1.26017	0.48789
69	MSMEG_0071	conserved hypothetical protein	1.40724	0.425759
70	MSMEG_0076	antigen MTB48	1.22504	0.334863
72	MSMEG_0078	hypothetical protein	1.69496	0.12051
73	MSMEG_0079	hypothetical protein	1.26736	0.478851
74	MSMEG_0080	conserved hypothetical protein	1.32025	0.378267
75	MSMEG_0081	conserved hypothetical protein	1.50574	0.345185
76	MSMEG_0082	conserved hypothetical protein	1.23946	0.0277212
77	MSMEG_0083	membrane-anchored mycosin mycp1	1.72426	0.167867
78	MSMEG_0084	phosphocarrier protein hpr	1.28614	0.301304
79	MSMEG_0085	PTS system, Fru family protein, IIABC components	5.13305	0.276066
80	MSMEG_0086	1-phosphofructokinase	2.03559	0.160452
81	MSMEG_0087	glucitol operon repressor	1.9017	0.207702
82	MSMEG_0088	phosphoenolpyruvate-protein phosphotransferase	1.23594	0.242644
83	MSMEG_0089	chromosome condensation protein	1.51254	0.177766
84	MSMEG_0090	conserved hypothetical protein	1.22778	0.421778
85	MSMEG_0091	putative transcriptional regulator	0.685693	0.188535
86	MSMEG_0092	probable transcriptional regulatory protein	1.18192	0.655798
87	MSMEG_0093	methyltransferase	1.26627	0.183249
88	MSMEG_0094	hypothetical protein	1.64739	0.254083
89	MSMEG_0095	methyltransferase	1.97313	0.408382
90	MSMEG_0096	peroxisomal hydratase-dehydrogenase-epimerase	2.34228	0.35158
91	MSMEG_0097	oxidoreductase, zinc-binding dehydrogenase family protein	1.39895	0.326684
92	MSMEG_0098	methyltransferase	1.30732	0.332252
93	MSMEG_0099	conserved hypothetical protein	0.939297	0.738504
94	MSMEG_0100	phosphotyrosine protein phosphatase ptpb	1.02924	0.835673
95	MSMEG_0101	conserved hypothetical protein	1.57348	0.392003
96	MSMEG_0102	putative acyl-CoA dehydrogenase	0.905175	0.21324
97	MSMEG_0103	major facilitator family protein transporter	1.86845	0.492052
98	MSMEG_0104	transcriptional regulator, LysR family protein	1.44571	0.326918
99	MSMEG_0105	DNA-binding response regulator, LuxR family protein	1.0851	0.769175
100	MSMEG_0106	sensory histidine kinase	0.96661	0.867151
101	MSMEG_0107	cell envelope-related function transcriptional attenuator common domain	0.859923	0.54001
102	MSMEG_0108	acyl-CoA dehydrogenase	1.78743	0.0860854
103	MSMEG_0109	NAD(P) transhydrogenase, beta subunit	2.1459	0.265825
104	MSMEG_0110	NAD(P) transhydrogenase, alpha subunit	1.81353	0.175813
105	MSMEG_0111	putative magnesium transport protein	1.24724	0.0836293
106	MSMEG_0112	hypothetical protein	1.1389	0.455014
107	MSMEG_0113	taurine transport system permease protein TauC	1.92321	0.0795652
108	MSMEG_0114	extracellular solute-binding protein, family protein 3	1.62488	0.289892
109	MSMEG_0115	haloacid dehalogenase, type II	0.507683	0.155235
110	MSMEG_0116	taurine import ATP-binding protein TauB	1.995	0.0357308
111	MSMEG_0117	hydrolase	0.654266	0.356639
112	MSMEG_0118	conserved hypothetical protein	0.925169	0.284385
113	MSMEG_0119	conserved hypothetical protein	0.956608	0.111017
114	MSMEG_0120	probable transcriptional regulatory protein	1.03619	0.738767
115	MSMEG_0121	rhamnolipids biosynthesis 3-oxoacyl-[acyl-carrier-protein] reductase	1.34863	0.287616
116	MSMEG_0122	putative periplasmic solute-binding protein	1.04561	0.871714
117	MSMEG_0123	hypothetical protein	1.00448	0.978045
118	MSMEG_0124	transcriptional regulator, GntR family protein	1.28935	0.233196
119	MSMEG_0125	integral membrane protein	0.994267	0.955493
120	MSMEG_0126	mandelate racemase/muconate lactonizing enzyme	1.1833	0.58094
121	MSMEG_0127	oxidoreductase, zinc-binding dehydrogenase family protein	0.687802	0.191631
122	MSMEG_0128	thioesterase superfamily protein	1.38386	0.305639
123	MSMEG_0129	cyclase/dehydrase family protein	1.26283	0.209315
124	MSMEG_0130	transcriptional regulator, GntR family protein	1.05368	0.720299
125	MSMEG_0131	AMP-binding enzyme, putative	2.20159	0.235843
126	MSMEG_0132	conserved hypothetical protein	1.46118	0.0562472
127	MSMEG_0133	ABC-transporter integral membrane protein	1.08464	0.795636
128	MSMEG_0134	virulence factor Mce family protein	2.08439	0.0835131
129	MSMEG_0135	virulence factor Mce family protein	2.13836	0.0958752
130	MSMEG_0136	virulence factor Mce family protein, putative	1.6647	0.375909
131	MSMEG_0137	virulence factor mce family protein	2.28894	0.0614931
132	MSMEG_0138	virulence factor Mce family protein	2.43525	0.0574401
133	MSMEG_0139	mce-family protein mce1f	1.7399	0.387412
134	MSMEG_0140	probable conserved mce associated membrane protein	1.31761	0.139895
136	MSMEG_0142	conserved hypothetical protein	1.37711	0.256513
137	MSMEG_0143	probable conserved mce associated membrane protein	1.67935	0.0867197
138	MSMEG_0144	HNH endonuclease	1.24717	0.655553
139	MSMEG_0145	conserved hypothetical protein	1.64809	0.103196
140	MSMEG_0146	mosc domain protein	1.12536	0.449784
141	MSMEG_0147	C-5 sterol desaturase	1.08635	0.618437
142	MSMEG_0148	transcriptional regulator, TetR family protein	0.833312	0.154042
143	MSMEG_0149	ThiC family protein	0.704478	0.00664029
144	MSMEG_0150	NAD(P) transhydrogenase beta subunit	1.15949	0.37428
145	MSMEG_0151	PntAB protein	1.66524	0.330156
146	MSMEG_0152	Alanine dehydrogenase/pyridine nucleotide transhydrogenase	1.9864	0.293415
147	MSMEG_0153	2-dehydropantoate 2-reductase	1.39005	0.220822
148	MSMEG_0154	pyruvate kinase	1.52518	0.447272
149	MSMEG_0155	transcriptional regulator	1.23946	0.306084
150	MSMEG_0156	transcriptional regulator, LysR family protein	2.21889	0.388605
151	MSMEG_0157	oxalyl-CoA decarboxylase	0.950479	0.78033
152	MSMEG_0158	formyl-coenzyme A transferase	1.71242	0.178867
153	MSMEG_0159	formate dehydrogenase, gamma subunit	1.12665	0.478254
154	MSMEG_0160	formate dehydrogenase, beta subunit	1.10474	0.363672
155	MSMEG_0161	formate dehydrogenase, alpha subunit	0.896183	0.632494
156	MSMEG_0162	NAD-dependent formate dehydrogenase delta subunit	1.10613	0.671904
157	MSMEG_0163	conserved hypothetical protein	1.05156	0.852507
158	MSMEG_0164	transmembrane transport protein	1.29147	0.403981
159	MSMEG_0165	formate dehydrogenase family protein accessory protein FdhD	1.00996	0.96982
160	MSMEG_0166	GntR-family protein transcriptional regulator	1.1526	0.49769
161	MSMEG_0167	transmembrane transport protein	0.995245	0.970651
162	MSMEG_0168	formyl-coenzyme A transferase	1.31807	0.0277525
163	MSMEG_0169	hypothetical protein	1.93692	0.0507
164	MSMEG_0170	transmembrane transport protein	1.03273	0.924178
165	MSMEG_0171	histone deacetylase superfamily protein	1.07559	0.84753
167	MSMEG_0173	hypothetical protein	1.21506	0.716526
168	MSMEG_0174	putative inner membrane protein	0.601185	0.0154439
169	MSMEG_0175	FAD dependent oxidoreductase, putative	1.74777	0.480591
170	MSMEG_0176	glutamine ABC transporter periplasmic-binding protein	0.764786	0.354566
171	MSMEG_0177	ABC polar amino acid family protein transporter, inner membrane subunit	1.40346	0.245071
172	MSMEG_0178	ATP-binding protein	0.629252	0.102358
173	MSMEG_0179	transcriptional regulator, GntR family protein	1.64522	0.182596
174	MSMEG_0180	putative HTH-type transcriptional regulator	1.26632	0.57723
175	MSMEG_0181	alpha-ketoglutarate-dependent taurine dioxygenase	1.09816	0.651656
176	MSMEG_0182	epoxide hydrolase 1	1.1516	0.812737
177	MSMEG_0183	conserved hypothetical protein	0.783651	0.556319
178	MSMEG_0184	transferase	1.10589	0.853049
179	MSMEG_0185	MmpL6 protein	1.325	0.669001
180	MSMEG_0186	MmpS2 protein	2.03389	0.463053
181	MSMEG_0187	acetyltransferase	1.20641	0.413892
182	MSMEG_0188	MarR-family protein transcriptional regulator	1.36477	0.627855
183	MSMEG_0189	conserved hypothetical protein	1.1956	0.53898
184	MSMEG_0190	integral membrane transport protein	1.68969	0.458193
185	MSMEG_0191	BadF/BadG/BcrA/BcrD ATPase family protein	1.14832	0.627772
186	MSMEG_0192	transcriptional regulator, RpiR family protein	1.39181	0.275844
187	MSMEG_0193	putative glucokinase regulator	1.09883	0.464702
188	MSMEG_0194	serine esterase, cutinase family protein	0.768147	0.196765
189	MSMEG_0195	steroid monooxygenase	0.695159	0.200977
190	MSMEG_0196	putative dehydrogenase	0.647272	0.156862
191	MSMEG_0197	nudix hydrolase	0.687367	0.149335
192	MSMEG_0198	acyl-CoA dehydrogenase, C- domain protein	0.688625	0.483206
193	MSMEG_0199	aminoglycoside phosphotransferase; this gene contains a frame shift which is not the result of sequencing error; identified by match to protein family HMM PF03881	0.988124	0.928334
194	MSMEG_0200	hypothetical protein	1.42082	0.101381
195	MSMEG_0201	hypothetical protein	0.930969	0.683659
196	MSMEG_0204	hypothetical protein	0.954646	0.851479
197	MSMEG_0205	tetracenomycin polyketide synthesis hydroxylase TcmH	0.927033	0.701697
198	MSMEG_0206	acyltransferase 3	1.12267	0.840919
199	MSMEG_0207	MarR-family protein transcriptional regulator	1.7302	0.0200902
200	MSMEG_0208	ribonuclease	1.20739	0.234063
201	MSMEG_0209	ribonuclease inhibitor	1.32078	0.35373
202	MSMEG_0210	LprO protein	0.88926	0.169305
203	MSMEG_0211	ABC transporter, ATP-binding protein	0.921149	0.709068
204	MSMEG_0212	lyase	1.20042	0.397546
205	MSMEG_0213	transcriptional regulator	1.19122	0.282471
206	MSMEG_0214	L-sorbosone dehydrogenase	1.488	0.446041
207	MSMEG_0215	YhhW family protein	0.642848	0.142381
208	MSMEG_0216	3-hydroxyacyl-CoA dehydrogenase	1.6654	0.347802
209	MSMEG_0217	alcohol dehydrogenase B	0.929694	0.745919
210	MSMEG_0218	3-demethylubiquinone-9 3-methyltransferase	1.11728	0.752206
211	MSMEG_0219	RNA polymerase sigma-70 factor, family protein	1.51239	0.0488157
212	MSMEG_0220	monoglyceride lipase	0.992962	0.973764
213	MSMEG_0221	secreted protein	0.876609	0.316273
214	MSMEG_0222	conserved hypothetical protein	0.71484	0.0470497
215	MSMEG_0223	conserved hypothetical protein	0.668684	0.141643
216	MSMEG_0224	O-methyltransferase MdmC	0.631198	0.135067
217	MSMEG_0225	MmpL4 protein	2.10794	0.0515133
218	MSMEG_0226	MmpS5 protein	2.8656	0.0858739
219	MSMEG_0227	transcriptional regulator, TetR family protein	0.963369	0.837951
220	MSMEG_0228	adenylate and Guanylate cyclase catalytic domain protein	1.02286	0.927193
221	MSMEG_0229	dihydroxy-acid dehydratase	1.49396	0.163108
222	MSMEG_0230	conserved hypothetical protein	1.22072	0.16098
223	MSMEG_0231	conserved hypothetical protein	0.784497	0.297226
224	MSMEG_0232	sugar transporter family protein	0.790748	0.435357
225	MSMEG_0233	lipoprotein Lpps	1.21981	0.172948
226	MSMEG_0234	metallopeptidase	0.938941	0.781151
227	MSMEG_0235	probable conserved membrane protein	1.68202	0.215731
228	MSMEG_0236	putative conserved transmembrane protein	1.63315	0.134444
229	MSMEG_0238	O-acetylhomoserine/O-acetylserine sulfhydrylase	1.81798	0.380637
230	MSMEG_0239	O-acetylhomoserine/O-acetylserine sulfhydrylase	2.90036	0.117574
231	MSMEG_0240	conserved hypothetical protein	0.836704	0.167834
232	MSMEG_0241	MmpL11 protein	0.844505	0.387812
233	MSMEG_0242	conserved hypothetical protein	0.859982	0.0500895
234	MSMEG_0243	conserved hypothetical protein	2.92858	0.198808
235	MSMEG_0244	two component response transcriptional regulatory protein prra	2.09882	0.119854
236	MSMEG_0245	probable conserved transmembrane protein	1.04108	0.838227
237	MSMEG_0246	sensor-type histidine kinase PrrB	2.56844	0.3159
238	MSMEG_0247	secreted peptidase	1.15657	0.509795
239	MSMEG_0248	conserved hypothetical protein	0.52399	0.0394118
240	MSMEG_0249	integral membrane protein	1.33553	0.585804
241	MSMEG_0250	membrane protein, MmpL family protein	1.47118	0.200679
242	MSMEG_0251	conserved hypothetical protein	1.12004	0.363539
243	MSMEG_0252	tRNA (guanine-N(7)-)-methyltransferase	1.00697	0.947238
244	MSMEG_0253	conserved hypothetical protein	1.13937	0.596744
245	MSMEG_0254	conserved hypothetical protein	0.919864	0.778961
246	MSMEG_0255	phosphoenolpyruvate carboxykinase	1.43697	0.0634047
247	MSMEG_0256	conserved hypothetical protein	1.48818	0.12884
248	MSMEG_0257	acyl-CoA synthase	1.50199	0.348755
249	MSMEG_0258	oxidoreductase, short chain dehydrogenase/reductase family protein	1.25545	0.302646
250	MSMEG_0259	enoyl-CoA hydratase/isomerase	1.64704	0.356983
251	MSMEG_0260	DNA-binding protein	0.789926	0.269998
252	MSMEG_0261	p40 protein	1.05091	0.69619
253	MSMEG_0262	conserved hypothetical protein	0.993945	0.980459
254	MSMEG_0263	amidohydrolase 3	1.35959	0.518946
255	MSMEG_0264	transmembrane transport protein	0.92026	0.328204
256	MSMEG_0265	uracil DNA glycosylase superfamily protein	1.11584	0.502122
257	MSMEG_0266	arginine decarboxylase	1.57716	0.468856
258	MSMEG_0267	esterase	1.84157	0.466399
259	MSMEG_0268	transcriptional regulator, GntR family protein	1.08394	0.638489
260	MSMEG_0269	3-oxoacyl-[acyl-carrier-protein] reductase	1.17764	0.638375
261	MSMEG_0270	aminoglycoside phosphotransferase	1.30325	0.181729
262	MSMEG_0271	conserved hypothetical protein	1.3647	0.622086
263	MSMEG_0272	propanediol utilization protein PduA	1.38194	0.452802
264	MSMEG_0273	ethanolamine utilization protein EutN	1.12873	0.661467
265	MSMEG_0274	hypothetical protein	1.23488	0.499421
266	MSMEG_0275	bacterial microcompartments protein family protein	1.20402	0.348942
267	MSMEG_0276	aldehyde-alcohol dehydrogenase	0.987235	0.817667
268	MSMEG_0277	putative aminotransferase	1.52216	0.370652
269	MSMEG_0278	hypothetical protein	1.16378	0.44308
270	MSMEG_0279	amino acid permease	1.02062	0.865338
271	MSMEG_0280	alpha/beta hydrolase fold	1.2756	0.633439
272	MSMEG_0281	choline dehydrogenase	1.09449	0.543155
273	MSMEG_0282	conserved hypothetical protein	1.28807	0.375543
274	MSMEG_0283	3-oxoacyl-[acyl-carrier-protein] reductase	1.18467	0.343439
275	MSMEG_0284	ribosyldihydronicotinamide dehydrogenase (quinone)	0.960615	0.820073
276	MSMEG_0285	transcriptional regulator TetR family protein	0.884474	0.379059
277	MSMEG_0286	GntR-family protein transcriptional regulator	1.00022	0.997653
278	MSMEG_0287	conserved hypothetical protein	2.49829	0.336612
279	MSMEG_0288	FAD dependent oxidoreductase, putative	1.21781	0.698854
280	MSMEG_0289	alpha/beta hydrolase fold family protein	1.44404	0.0799711
281	MSMEG_0290	acyltransferase, ws/dgat/mgat subfamily protein	1.91949	0.0741598
282	MSMEG_0291	dioxygenase, TauD/TfdA family protein	1.30351	0.180471
283	MSMEG_0292	conserved hypothetical protein	0.921638	0.796419
284	MSMEG_0293	Rieske [2Fe-2S] domain protein	1.06598	0.696765
285	MSMEG_0294	3-oxoacyl-(acyl-carrier-protein) reductase	1.10301	0.744935
286	MSMEG_0295	oxidoreductase, FAD-binding	1.64621	0.124943
287	MSMEG_0296	transcriptional regulator, MarR family protein	1.07064	0.386882
288	MSMEG_0297	amidohydrolase	0.985156	0.849201
289	MSMEG_0298	conserved hypothetical protein	0.96334	0.784455
290	MSMEG_0299	Rieske [2Fe-2S] domain protein	1.00175	0.995498
291	MSMEG_0300	amidohydrolase family protein	0.88396	0.559738
292	MSMEG_0301	oxidoreductase, FAD-binding	0.576414	0.179944
293	MSMEG_0302	peptidase, S9A/B/C families	1.46462	0.32505
294	MSMEG_0303	alcohol dehydrogenase, zinc-containing	1.1877	0.45254
295	MSMEG_0304	acyl-CoA synthase	1.27114	0.261427
296	MSMEG_0305	acyltransferase domain protein	1.05835	0.638208
297	MSMEG_0306	arylamine N-acetyltransferase	1.11811	0.756443
298	MSMEG_0307	transcriptional regulator, AraC family protein	0.810854	0.297875
299	MSMEG_0308	dihydrofolate reductase	0.955739	0.839425
300	MSMEG_0309	aldehyde dehydrogenase family protein	1.30385	0.420929
301	MSMEG_0310	SAM-dependent methyltransferase; this gene contains a frame shift which is not the result of sequencing error	1.2237	0.526375
302	MSMEG_0311	glycosyltransferase	1.29439	0.489479
303	MSMEG_0312	2-dehydro-3-deoxyphosphogluconate aldolase/4-hydroxy-2-oxoglutarate aldolase	0.814981	0.147487
304	MSMEG_0313	phosphogluconate dehydratase	1.09922	0.849625
305	MSMEG_0314	glucose-6-phosphate 1-dehydrogenase	0.766401	0.202846
306	MSMEG_0315	probable conserved transmembrane protein	1.71181	0.224334
307	MSMEG_0316	putative NagC regulator	0.726251	0.0167038
308	MSMEG_0317	conserved hypothetical protein	1.5862	0.125712
309	MSMEG_0318	AMP-dependent synthetase and ligase	1.18965	0.785678
310	MSMEG_0319	acyltransferase	0.697768	0.369239
311	MSMEG_0320	putative phosphotriesterase	1.07825	0.868089
312	MSMEG_0321	transcriptional regulator	1.36731	0.334224
313	MSMEG_0322	glyoxylase family protein; this gene contains a frame shift which is not the result of sequencing error	0.949585	0.815399
314	MSMEG_0323	acyl-CoA dehydrogenase, short-chain specific, putative	0.95284	0.644818
315	MSMEG_0324	conserved hypothetical protein	2.586	0.158945
316	MSMEG_0325	conserved hypothetical protein	1.21265	0.501751
317	MSMEG_0326	AMP-dependent synthetase and ligase	1.45957	0.472292
318	MSMEG_0327	aldehyde dehydrogenase	0.987201	0.946414
319	MSMEG_0328	hypothetical protein	1.25703	0.216312
320	MSMEG_0329	FMN oxidoreductase	1.25097	0.450433
321	MSMEG_0330	transcriptional regulator, LuxR family protein	1.43318	0.330068
322	MSMEG_0331	transcriptional regulator, LuxR family protein	1.26086	0.362613
323	MSMEG_0332	2-nitropropane dioxygenase, NPD	1.08294	0.533557
324	MSMEG_0333	Carboxyl transferase domain protein	1.77683	0.232986
325	MSMEG_0334	acetyl-/propionyl-coenzyme A carboxylase alpha chain	2.06674	0.392477
326	MSMEG_0335	enoyl-CoA hydratase/isomerase	1.50989	0.18941
327	MSMEG_0336	conserved hypothetical protein	1.54898	0.115641
328	MSMEG_0337	conserved hypothetical protein	2.10338	0.293574
329	MSMEG_0338	acyl-CoA dehydrogenase fadE12	1.4549	0.360855
330	MSMEG_0339	FMN-dependent monooxygenase	0.930751	0.634851
331	MSMEG_0340	enoyl-CoA hydratase/isomerase family protein	1.55093	0.258118
332	MSMEG_0341	conserved hypothetical protein	1.15802	0.647241
333	MSMEG_0342	hypothetical protein	2.51497	0.125913
334	MSMEG_0343	TetR-family protein transcriptional regulator	1.31182	0.561083
335	MSMEG_0344	conserved hypothetical protein	1.09533	0.75928
336	MSMEG_0345	conserved hypothetical protein	1.11322	0.694725
337	MSMEG_0346	virulence factor	0.888929	0.578769
338	MSMEG_0347	virulence factor Mce family protein	1.32534	0.416428
339	MSMEG_0348	mce-family protein mce3c	1.21981	0.383288
340	MSMEG_0349	virulence factor mce family protein	1.03592	0.818196
341	MSMEG_0350	virulence factor Mce family protein	1.11687	0.64411
342	MSMEG_0351	virulence factor mce family protein	0.923257	0.69197
343	MSMEG_0352	conserved hypothetical protein	1.29259	0.25802
344	MSMEG_0353	conserved hypothetical protein	1.34187	0.242314
345	MSMEG_0354	conserved hypothetical protein	0.816355	0.485266
346	MSMEG_0355	conserved hypothetical protein	0.823366	0.0613109
347	MSMEG_0356	acetyltransferase	0.75415	0.277707
348	MSMEG_0357	transmembrane transport protein	1.09176	0.64727
349	MSMEG_0358	ribonucleoside-diphosphate reductase, beta subunit	1.34204	0.237877
350	MSMEG_0359	conserved hypothetical protein	1.6974	0.270632
351	MSMEG_0360	conserved hypothetical protein	1.26384	0.492199
352	MSMEG_0361	Glycosyl hydrolase family protein 3	1.73605	0.320174
353	MSMEG_0362	amidohydrolase 2	0.905646	0.725819
354	MSMEG_0363	TetR-family protein regulatory protein	0.860429	0.411708
355	MSMEG_0364	hypothetical protein	1.05938	0.765116
356	MSMEG_0365	conserved hypothetical protein	1.85084	0.348734
357	MSMEG_0366	hypothetical protein	1.5741	0.308716
358	MSMEG_0367	O-demethylpuromycin-O-methyltransferase	1.80196	0.331612
359	MSMEG_0368	hypothetical protein	1.53657	0.225305
360	MSMEG_0369	hypothetical protein	1.20543	0.362544
361	MSMEG_0370	conserved hypothetical protein	0.893298	0.537755
362	MSMEG_0371	MaoC like domain protein	0.665904	0.0060468
363	MSMEG_0372	oxidoreductase, short chain dehydrogenase/reductase family protein	2.5461	0.42955
364	MSMEG_0373	3-ketoacyl-CoA thiolase	0.768928	0.0662307
365	MSMEG_0374	glycolate oxidase subunit	2.13338	0.523679
366	MSMEG_0375	phospholipase D family protein	0.709958	0.0641497
367	MSMEG_0376	transcriptional regulator, AraC family protein	0.574913	0.257736
368	MSMEG_0377	nitrile hydratase	1.06311	0.718257
369	MSMEG_0378	nitrile hydratase, alpha subunit	0.830285	0.147462
370	MSMEG_0379	nitrile hydratase activator P14k	1.00378	0.991441
371	MSMEG_0380	MmpS4 protein	1.7472	0.103794
372	MSMEG_0381	Mmp14a protein	3.89869	0.15003
373	MSMEG_0382	putative transport protein	1.90385	0.157554
374	MSMEG_0383	conserved hypothetical protein	0.948753	0.616943
375	MSMEG_0384	glucose-1-phosphate thymidylyltransferase	1.32596	0.159596
376	MSMEG_0385	hypothetical glycosyl transferase	0.984403	0.888396
377	MSMEG_0386	NAD dependent epimerase/dehydratase family protein	1.8134	0.265144
378	MSMEG_0387	Rmt2 protein	0.845771	0.0909945
379	MSMEG_0388	Macrocin-O-methyltransferase	2.02308	0.183969
380	MSMEG_0389	hypothetical glycosyl transferase	2.40753	0.177391
381	MSMEG_0390	putative acyltransferase	1.67118	0.125216
382	MSMEG_0391	Rmt3 protein	1.34113	0.298488
383	MSMEG_0392	hypothetical glycosyl transferase	1.24592	0.198906
384	MSMEG_0393	Fmt protein	0.730655	0.466312
385	MSMEG_0394	hypothetical protein	1.27446	0.0759297
386	MSMEG_0395	hypothetical protein	1.00982	0.967984
387	MSMEG_0396	hypothetical protein	1.42204	0.489833
388	MSMEG_0399	conserved domain protein	1.33001	0.467459
389	MSMEG_0400	peptide synthetase	1.4377	0.294656
390	MSMEG_0401	putative non-ribosomal peptide synthase	1.27345	0.57406
391	MSMEG_0402	linear gramicidin synthetase subunit D	1.52683	0.0600797
392	MSMEG_0403	integral membrane protein	1.18596	0.378285
393	MSMEG_0404	sigma associated protein	1.3592	0.420751
394	MSMEG_0405	extra cytoplasmic sigma factor	0.883311	0.487319
395	MSMEG_0406	acyl-coA-dehydrogenase	0.877243	0.610053
396	MSMEG_0407	conserved hypothetical protein	1.21944	0.137405
397	MSMEG_0408	type I modular polyketide synthase	1.04662	0.653082
398	MSMEG_0409	Condensation domain protein	1.7111	0.37586
399	MSMEG_0410	MmpL protein	2.17253	0.307827
400	MSMEG_0411	acyl-CoA synthase	1.8241	0.296724
401	MSMEG_0412	conserved hypothetical protein	0.660474	0.185269
402	MSMEG_0413	conserved hypothetical protein	1.32378	0.272338
403	MSMEG_0414	oxidoreductase, 2OG-Fe(II) oxygenase family protein	1.17657	0.685989
404	MSMEG_0415	NADH-fmn oxidoreductase	0.978606	0.929446
405	MSMEG_0416	hypothetical protein	0.814148	0.225955
406	MSMEG_0417	succinate dehydrogenase	1.17387	0.386635
407	MSMEG_0418	succinate dehydrogenase flavoprotein subunit	1.6686	0.181779
408	MSMEG_0419	integral membrane protein	1.33993	0.301615
409	MSMEG_0420	conserved hypothetical protein	0.707221	0.124902
410	MSMEG_0421	hypothetical protein	1.47524	0.548151
411	MSMEG_0422	transferase	1.32838	0.311531
412	MSMEG_0423	conserved hypothetical protein	0.979997	0.877161
413	MSMEG_0424	Hsp20/alpha crystallin family protein	1.41048	0.165775
414	MSMEG_0425	putative membrane protein DcsA	1.34351	0.475755
415	MSMEG_0426	transcriptional regulator, GntR family protein	0.869262	0.115344
416	MSMEG_0427	nitrite reductase [NAD(P)H], large subunit	1.17813	0.370941
417	MSMEG_0428	nitrite reductase [NAD(P)H] small subunit	1.32834	0.357108
418	MSMEG_0429	putative ferric uptake regulator	1.20635	0.16412
419	MSMEG_0431	secreted protein	1.27379	0.274171
420	MSMEG_0432	uroporphyrinogen-III synthetase	1.32834	0.431769
421	MSMEG_0433	nitrite extrusion protein	1.38757	0.48098
422	MSMEG_0434	aminoglycoside 2'-N-acetyltransferase (AAC(2')-Id)	0.662771	0.155977
423	MSMEG_0435	allophanate hydrolase subunit 2	0.408742	0.0926464
424	MSMEG_0436	allophanate hydrolase subunit 1	0.480318	0.0876058
425	MSMEG_0437	conserved hypothetical integral membrane protein	0.940034	0.626221
426	MSMEG_0438	Periplasmic binding protein	1.31029	0.517298
427	MSMEG_0439	conserved hypothetical protein	1.24207	0.334848
428	MSMEG_0440	hypothetical protein	1.73841	0.415292
429	MSMEG_0441	conserved hypothetical protein, putative	1.66845	0.249705
430	MSMEG_0442	tetracyclin repressor, C- all-alpha domain protein	1.02511	0.701706
431	MSMEG_0443	hydrolase, carbon-nitrogen family protein	1.58834	0.0592527
432	MSMEG_0444	agmatine deiminase	1.98986	0.114563
433	MSMEG_0445	amidohydrolase family protein	2.76048	0.164662
434	MSMEG_0446	putrescine importer	1.59363	0.332971
435	MSMEG_0447	conserved hypothetical protein	2.66181	0.398935
436	MSMEG_0448	transcriptional regulator, MarR family protein	1.23504	0.266014
437	MSMEG_0449	transporter, major facilitator family protein, putative	1.25957	0.57373
438	MSMEG_0450	hypothetical protein	1.23006	0.60281
439	MSMEG_0451	oxidoreductase, FAD-linked	0.994281	0.987224
440	MSMEG_0452	inner membrane permease YgbN	1.55722	0.542708
441	MSMEG_0453	shikimate kinase	0.863772	0.0620507
442	MSMEG_0454	GntR-family protein transcriptional regulator	2.32024	0.289434
443	MSMEG_0455	aldehyde dehydrogenase	2.08076	0.184321
444	MSMEG_0456	DNA gyrase subunit A	1.35218	0.272836
445	MSMEG_0457	DNA topoisomerase IV subunit B	2.42311	0.178002
446	MSMEG_0458	two-component system sensor kinase	0.730865	0.185319
447	MSMEG_0459	two-component system response regulator	1.21631	0.658538
448	MSMEG_0460	alpha/beta hydrolase fold	1.01666	0.81939
449	MSMEG_0461	CinZ protein	1.69576	0.235261
450	MSMEG_0462	MmpS4 protein	1.3741	0.344947
451	MSMEG_0463	MmpL4 protein	1.30873	0.446935
452	MSMEG_0464	phosphomethylpyrimidine kinase	1.00003	0.999801
453	MSMEG_0465	transcriptional regulator, TetR family protein	2.07033	0.471062
454	MSMEG_0466	hypothetical protein	1.63776	0.216096
455	MSMEG_0467	membrane transport protein	1.29694	0.335611
456	MSMEG_0468	integral membrane protein	1.14532	0.706031
457	MSMEG_0469	transcriptional regulatory protein PadR-	0.888694	0.444603
458	MSMEG_0470	para-nitrobenzyl esterase	1.02411	0.924349
459	MSMEG_0471	transcriptional regulator LysR family protein	1.30412	0.317165
460	MSMEG_0472	putative lipoprotein	1.0436	0.681569
461	MSMEG_0473	transcriptional regulator, LuxR family protein	1.25259	0.73324
462	MSMEG_0474	glucosamine--fructose-6-phosphate aminotransferase (isomerizing)	1.1322	0.607013
463	MSMEG_0475	nucleotide-sugar dehydrogenase	1.81004	0.243956
464	MSMEG_0476	chitin synthase	1.08392	0.578796
465	MSMEG_0477	hypothetical protein	1.24105	0.300732
466	MSMEG_0478	secreted protein, putative	1.289	0.258405
467	MSMEG_0479	hypothetical protein	1.11465	0.759908
468	MSMEG_0480	transcriptional regulator, GntR family protein	1.59549	0.43386
469	MSMEG_0481	FAD dependent oxidoreductase	1.87937	0.357977
470	MSMEG_0482	dihydroxy-acid dehydratase	1.30116	0.503267
471	MSMEG_0483	shikimate transporter	0.85588	0.175265
472	MSMEG_0484	formamidase	1.32944	0.360517
473	MSMEG_0485	amidase	1.90989	0.337023
474	MSMEG_0486	putative ABC transporter, periplasmic protein	0.960471	0.54282
475	MSMEG_0487	ABC transporter permease	1.11469	0.655475
476	MSMEG_0488	ABC transporter ATP-binding protein	1.14446	0.487548
477	MSMEG_0489	racemase	1.18511	0.403269
478	MSMEG_0490	enoyl-CoA hydratase	0.880604	0.4782
479	MSMEG_0491	transcriptional regulator, LacI family protein	0.661676	0.166041
480	MSMEG_0492	conserved hypothetical protein	0.822024	0.428766
481	MSMEG_0493	hypothetical protein	0.715296	0.317915
482	MSMEG_0494	hypothetical protein	0.916238	0.814329
483	MSMEG_0495	glycerol dehydratase reactivase chain A, putative; this gene contains a frame shift which is not the result of sequencing error	1.18643	0.389667
484	MSMEG_0496	coenzyme B12-dependent glycerol dehydrogenase small subunit	1.2295	0.472782
485	MSMEG_0497	glycerol dehydratase large subunit	1.05446	0.852612
486	MSMEG_0498	hypothetical protein	1.18769	0.536793
487	MSMEG_0499	amino acid permease-associated region	0.992554	0.963303
488	MSMEG_0500	regulator of polyketide synthase expression, putative	1.68164	0.294214
489	MSMEG_0501	glucosamine-6-phosphate deaminase 1	1.03379	0.845484
490	MSMEG_0502	glucosidase	1.46844	0.304046
491	MSMEG_0503	DeoR-family protein transcriptional regulator	1.35346	0.456778
492	MSMEG_0504	carbohydrate kinase	1.41798	0.536852
493	MSMEG_0505	probable sugar ABC transporter, substrate-binding protein, putative	1.33159	0.0806994
494	MSMEG_0506	ABC transporter, permease protein	1.08664	0.178831
495	MSMEG_0507	probable sugar ABC transporter, permease protein	0.950848	0.786802
496	MSMEG_0508	glycerol-phosphate porter	1.18933	0.652627
497	MSMEG_0509	transcriptional regulatory protein	1.49513	0.224646
498	MSMEG_0510	D-tagatose-bisphosphate aldolase, class II, non-catalytic subunit	0.887953	0.488244
499	MSMEG_0511	putative sugar isomerase, AgaS family protein	1.47902	0.392848
500	MSMEG_0512	BadF/BadG/BcrA/BcrD ATPase family protein	1.1457	0.503681
501	MSMEG_0513	integral membrane protein	0.864019	0.0807429
502	MSMEG_0514	alpha-galactosidase	0.776569	0.196882
503	MSMEG_0515	probable sugar transporter sugar binding lipoprotein	1.371	0.372355
504	MSMEG_0516	sugar transport system	1.47671	0.155828
505	MSMEG_0517	sugar binding-protein dependent transporter system permease	2.01447	0.235129
506	MSMEG_0518	ABC transporter, nucleotide binding/ATPase protein, sn-Glycerol-3-phosphate	2.32508	0.217584
507	MSMEG_0519	conserved hypothetical protein	0.659475	0.0306043
508	MSMEG_0520	porin	1.36211	0.560625
509	MSMEG_0521	conserved hypothetical protein; this gene contains a frame shift which is not the result of sequencing error	1.19267	0.417328
510	MSMEG_0521	conserved hypothetical protein; this gene contains a frame shift which is not the result of sequencing error	2.1846	0.438704
511	MSMEG_0522	pp24 protein	1.33859	0.463662
512	MSMEG_0523	DNA-binding protein	1.04532	0.902312
513	MSMEG_0524	short chain dehydrogenase	1.0145	0.935836
514	MSMEG_0525	hypothetical protein	1.58745	0.179333
515	MSMEG_0526	oxidoreductase, GMC family protein	1.14803	0.550202
516	MSMEG_0527	2-hydroxycyclohexnecarboxyl-CoA dehydrogenase	1.06868	0.774158
517	MSMEG_0528	conserved hypothetical protein	1.10411	0.617978
518	MSMEG_0529	probable serine/threonine-protein kinase PknK	1.02454	0.906141
519	MSMEG_0530	short chain dehydrogenase	4.93643	0.298044
520	MSMEG_0531	putative acyl-CoA dehydrogenase	2.29331	0.0866068
521	MSMEG_0532	transcriptional regulator, TetR family protein	1.33974	0.318515
522	MSMEG_0533	gp236 protein	0.879943	0.546396
523	MSMEG_0534	permease, major facilitator family protein	1.13264	0.789084
524	MSMEG_0535	GntR-family protein transcriptional regulator	1.48013	0.336792
525	MSMEG_0536	intracellular protease, PfpI family protein	1.20341	0.249342
526	MSMEG_0537	conserved hypothetical protein	0.742425	0.110232
527	MSMEG_0537	conserved hypothetical protein	0.954685	0.846394
528	MSMEG_0538	regulatory protein, MarR	0.934782	0.696423
529	MSMEG_0539	transcriptional regulator, Crp/Fnr family protein	1.69459	0.164876
530	MSMEG_0540	transcriptional regulator, putative	1.07792	0.58473
531	MSMEG_0541	hypothetical protein	0.977437	0.820107
532	MSMEG_0542	antar domain protein	0.894706	0.304216
533	MSMEG_0543	conserved hypothetical protein	0.816289	0.463299
534	MSMEG_0544	transcriptional regulator	0.697136	0.109342
535	MSMEG_0545	transcriptional regulator, LuxR family protein	0.657456	0.169802
536	MSMEG_0546	conserved hypothetical protein	1.52968	0.108634
537	MSMEG_0547	ISMsm5, transposase	0.72772	0.126635
538	MSMEG_0548	chromosome replication initiation inhibitor protein	1.43069	0.267635
542	MSMEG_0552	conserved hypothetical protein	1.49404	0.245584
543	MSMEG_0553	probable sugar ABC transporter, substrate-binding protein, putative	1.58998	0.381635
544	MSMEG_0554	ABC transporter permease protein, putative	1.3996	0.484902
545	MSMEG_0555	ABC transporter permease protein	1.2828	0.379386
546	MSMEG_0556	ABC transporter, nucleotide binding/ATPase protein	1.72004	0.422777
547	MSMEG_0557	hypothetical protein	1.2467	0.43385
548	MSMEG_0558	conserved hypothetical protein	1.16576	0.442419
549	MSMEG_0559	conserved domain protein	1.20728	0.0353574
550	MSMEG_0560	dihydrodipicolinate reductase, N-terminus domain protein	1.49663	0.327112
551	MSMEG_0561	putative TetR family protein receptor protein	0.937535	0.692209
552	MSMEG_0562	conserved hypothetical protein	1.06065	0.706085
553	MSMEG_0563	hypothetical protein	1.48375	0.0200809
554	MSMEG_0564	xanthine/uracil permease	1.53773	0.38224
555	MSMEG_0565	putative glycosyl transferases group 1	0.897676	0.737141
556	MSMEG_0566	aliphatic amidase	1.4006	0.33043
557	MSMEG_0567	selenophosphate synthetase	1.33025	0.346015
558	MSMEG_0568	radical SAM domain protein	0.96995	0.8499
559	MSMEG_0569	flavoprotein involved in K+ transport	0.97386	0.728083
560	MSMEG_0570	conserved hypothetical protein	1.38956	0.54504
561	MSMEG_0571	hydrolase, carbon-nitrogen family protein	1.17964	0.438524
562	MSMEG_0572	conserved hypothetical protein	1.0878	0.167914
563	MSMEG_0573	putative ECF sigma factor RpoE1	0.919961	0.619402
564	MSMEG_0574	putative ECF sigma factor RpoE1	1.04779	0.71374
565	MSMEG_0575	MmpS1 protein	1.17847	0.407717
566	MSMEG_0576	MmpL4 protein	1.20826	0.298081
567	MSMEG_0577	major facilitator superfamily protein, putative	1.93214	0.0194879
568	MSMEG_0578	acyl-CoA dehydrogenase, middle domain protein	1.49669	0.427564
569	MSMEG_0579	helix-turn-helix, Fis-type	1.64747	0.464895
570	MSMEG_0580	conserved hypothetical protein	0.849903	0.508141
571	MSMEG_0581	4-aminobutyrate transaminase	1.25386	0.314262
572	MSMEG_0582	succinic semialdehyde dehydrogenase	1.02864	0.869228
573	MSMEG_0583	probable membrane protein	1.28429	0.544331
575	MSMEG_0585	L-carnitine dehydratase/bile acid-inducible protein F	1.50066	0.436754
576	MSMEG_0586	stas domain, putative	0.626052	0.0644851
577	MSMEG_0587	L-rhamnose 1-epimerase	1.05028	0.616276
578	MSMEG_0588	putative rhamnose tranport protein, MFS family protein	0.677089	0.0150803
579	MSMEG_0589	L-rhamnose isomerase	0.97741	0.846519
580	MSMEG_0590	rhamnulose-1-phosphate aldolase/alcohol dehydrogenase	1.10048	0.791621
581	MSMEG_0591	rhamnulokinase	0.861987	0.410717
582	MSMEG_0592	putative rhamnose catabolism operon transcriptional regulator	0.971724	0.849842
583	MSMEG_0593	conserved hypothetical protein	0.883721	0.619082
584	MSMEG_0594	iron-sulfur cluster binding protein	1.70402	0.26357
585	MSMEG_0595	glycolate oxidase	1.09634	0.35408
586	MSMEG_0596	bacterial regulatory protein, GntR family protein	2.90657	0.418789
587	MSMEG_0597	conserved hypothetical protein	0.914005	0.717435
588	MSMEG_0598	hypothetical protein	1.18366	0.394084
589	MSMEG_0599	acyl-CoA synthase	2.47546	0.16546
590	MSMEG_0600	dehydrogenase	0.647959	0.171511
591	MSMEG_0601	conserved hypothetical protein	0.761962	0.0204461
592	MSMEG_0602	hypothetical protein	0.890353	0.693431
593	MSMEG_0603	putative acyl-CoA dehydrogenase	1.66056	0.168126
594	MSMEG_0604	glyoxylate reductase	0.928223	0.852137
595	MSMEG_0605	conserved hypothetical protein	1.76237	0.546365
596	MSMEG_0606	transcriptional regulator, TetR family protein	0.969824	0.90829
597	MSMEG_0607	methyltransferase, putative, family protein	0.884355	0.789211
598	MSMEG_0608	glyoxalase family protein	1.30336	0.435402
599	MSMEG_0609	helix-turn-helix domain protein	0.693989	0.251626
600	MSMEG_0610	beta-lactamase	1.0532	0.779762
601	MSMEG_0611	para-nitrobenzyl esterase	1.20313	0.51238
602	MSMEG_0612	transcriptional regulator, TetR family protein	1.03527	0.893821
603	MSMEG_0613	conserved hypothetical protein	1.06383	0.817486
604	MSMEG_0614	methyltransferase	0.522683	0.156428
605	MSMEG_0615	ATPase, AAA family protein	1.70249	0.391594
606	MSMEG_0616	conserved hypothetical protein	1.10413	0.782012
607	MSMEG_0617	ftsk/spoiiie family protein	1.5648	0.577598
608	MSMEG_0618	pe family protein	1.37432	0.564558
609	MSMEG_0619	ppe family protein	1.69693	0.459251
610	MSMEG_0620	pe family protein	1.70665	0.600311
611	MSMEG_0621	low molecular weight protein antigen 7	2.20973	0.501835
612	MSMEG_0622	putative DNA-binding protein	2.03358	0.523867
613	MSMEG_0623	secretion protein Snm4	1.52926	0.660951
614	MSMEG_0624	subtilase family protein	2.14372	0.42356
615	MSMEG_0625	conserved hypothetical protein	1.48924	0.3233
616	MSMEG_0626	conserved hypothetical protein	1.41096	0.590803
617	MSMEG_0627	glycosyl transferase, family protein 39	0.562253	0.165795
618	MSMEG_0628	amidohydrolase family protein	1.45481	0.327997
619	MSMEG_0629	trans-aconitate 2-methyltransferase	1.25652	0.514281
620	MSMEG_0630	conserved hypothetical protein	0.763861	0.186383
621	MSMEG_0631	sulfatase family protein, authentic frameshift; this gene contains a frame shift which is not the result of sequencing error; identified by match to protein family HMM PF00884	0.947267	0.822907
622	MSMEG_0632	conserved hypothetical protein	0.717703	0.162596
623	MSMEG_0633	PAP2 superfamily protein	1.24522	0.569901
624	MSMEG_0634	PAP2 superfamily protein	0.9907	0.961229
625	MSMEG_0635	putative conserved exported protein	1.62431	0.349792
626	MSMEG_0636	conserved hypothetical protein	1.77529	0.120958
627	MSMEG_0637	iron-sulfur binding oxidoreductase	1.10888	0.758418
628	MSMEG_0638	conserved hypothetical proline and threonine rich protein	1.18592	0.556259
629	MSMEG_0639	oligopeptide transport ATP-binding protein AppF	1.21544	0.482122
630	MSMEG_0640	oligopeptide transport ATP-binding protein OppD	0.800721	0.135219
631	MSMEG_0641	binding-protein-dependent transport systems inner membrane component	0.739814	0.0724062
632	MSMEG_0642	hypothetical ABC transporter permease protein YliD	1.13007	0.520873
633	MSMEG_0643	extracellular solute-binding protein, family protein 5, putative	0.669005	0.0690946
634	MSMEG_0644	cupin domain protein	1.47987	0.22223
635	MSMEG_0645	putative beta-1,3-glucanase	1.01144	0.963574
636	MSMEG_0646	putative transporter	0.799837	0.229334
637	MSMEG_0647	phosphonate ABC transporter, ATP-binding protein	2.23684	0.117623
638	MSMEG_0648	hypothetical protein	1.9031	0.300495
639	MSMEG_0649	phosphonate-binding periplasmic protein	0.881051	0.252035
640	MSMEG_0650	GntR-family protein transcriptional regulator	2.11046	0.27392
641	MSMEG_0651	putative conserved exported protein	1.61965	0.071249
642	MSMEG_0652	hypothetical protein	1.04022	0.834037
643	MSMEG_0653	hypothetical protein; this gene contains a frame shift which is not the result of sequencing error; identified by Glimmer2; putative	0.724714	0.283488
644	MSMEG_0654	conserved hypothetical protein	1.06045	0.744869
645	MSMEG_0655	glucose 1-dehydrogenase, putative	1.19973	0.540647
646	MSMEG_0656	transcriptional regulator, TetR family protein	1.19353	0.432215
647	MSMEG_0657	Rieske 2Fe-2S domain protein	2.13938	0.41779
648	MSMEG_0658	polyamine ABC-transporter, inner membrane subunit	1.65101	0.38149
649	MSMEG_0659	polyamine ABC transporter permease protein	0.919643	0.703339
650	MSMEG_0660	Bacterial extracellular solute-binding protein	1.19508	0.606187
651	MSMEG_0661	glutamate-1-semialdehyde 2,1-aminomutase	1.55125	0.449579
652	MSMEG_0662	putrescine transport ATP-binding protein PotG	0.876872	0.393931
653	MSMEG_0663	TetR-family protein transcriptional regulator	0.891619	0.0206593
654	MSMEG_0664	FAD dependent oxidoreductase	1.31176	0.269603
655	MSMEG_0665	sarcosine oxidase subunit beta, putative	2.19919	0.309414
656	MSMEG_0666	acetyl-CoA synthetase, putative	0.853112	0.504884
657	MSMEG_0667	butyryl-CoA dehydrogenase	1.0099	0.977029
658	MSMEG_0668	integral membrane protein	0.853987	0.488904
659	MSMEG_0669	hypothetical protein	0.862156	0.484835
660	MSMEG_0670	FAD dependent oxidoreductase	1.43219	0.51871
661	MSMEG_0671	S-(hydroxymethyl)glutathione dehydrogenase	3.06979	0.447438
662	MSMEG_0672	conserved hypothetical protein	1.02246	0.951611
663	MSMEG_0673	hypothetical protein	1.4828	0.169097
664	MSMEG_0674	ErfK/YbiS/YcfS/YnhG family protein	1.47104	0.146759
665	MSMEG_0675	putative cytochrome P450 144	0.921486	0.533335
666	MSMEG_0676	putative transcriptional regulatory protein	1.01435	0.851775
667	MSMEG_0678	deoxycytidine triphosphate deaminase	1.0944	0.705186
668	MSMEG_0679	conserved hypothetical protein	0.759626	0.145037
669	MSMEG_0680	UDP-glucose 6-dehydrogenase	2.68007	0.411293
670	MSMEG_0681	P450 heme-thiolate protein	0.972272	0.854969
671	MSMEG_0682	conserved hypothetical protein, putative	1.06949	0.617478
672	MSMEG_0683	conserved hypothetical protein	0.94841	0.768169
673	MSMEG_0684	aldehyde oxidase and xanthine dehydrogenase, molybdopterin binding	1.13351	0.732017
674	MSMEG_0685	oxidoreductase, molybdopterin-binding subunit	1.55962	0.377709
675	MSMEG_0686	oxidoreductase	0.929296	0.702725
676	MSMEG_0687	conserved hypothetical protein	1.40262	0.361596
677	MSMEG_0688	aspartate aminotransferase	1.60177	0.0289616
678	MSMEG_0689	hypothetical protein	2.9279	0.252806
679	MSMEG_0690	iron-sulfur cluster-binding protein	1.4264	0.102021
680	MSMEG_0691	putative transcriptional regulatory protein	1.58185	0.0823344
681	MSMEG_0692	conserved hypothetical protein	1.49925	0.215734
682	MSMEG_0693	conserved hypothetical protein	1.06586	0.876202
683	MSMEG_0694	conserved hypothetical protein; this gene contains a frame shift which is not the result of sequencing error	0.878827	0.71556
684	MSMEG_0695	isoniazid inductible protein IniA	0.649796	0.116814
685	MSMEG_0696	alanine-rich protein	1.05644	0.810065
686	MSMEG_0697	integral membrane protein	0.853804	0.427992
687	MSMEG_0698	isoniazid inductible protein IniC	0.962456	0.900614
688	MSMEG_0699	conserved hypothetical proline rich protein	0.763219	0.455627
689	MSMEG_0700	hypothetical protein	1.57144	0.4339
690	MSMEG_0701	hypothetical protein	0.943309	0.818436
691	MSMEG_0702	monooxygenase	0.844675	0.447379
692	MSMEG_0703	conserved hypothetical protein	0.68731	0.160583
693	MSMEG_0704	LpqJ protein	1.14037	0.664765
694	MSMEG_0705	putative permease of the major facilitator superfamily protein	1.11869	0.516058
695	MSMEG_0706	4-carboxy-4-hydroxy-2-oxoadipate aldolase	0.913987	0.202555
696	MSMEG_0707	conserved hypothetical protein	0.896586	0.340511
697	MSMEG_0708	transcriptional regulator, LysR family protein	1.49583	0.397997
698	MSMEG_0709	chaperone protein DnaK	1.12049	0.442548
699	MSMEG_0710	co-chaperone GrpE	1.26868	0.16165
700	MSMEG_0711	chaperone protein DnaJ	1.10828	0.487827
701	MSMEG_0712	transcriptional regulator, TetR family protein	1.19357	0.482375
702	MSMEG_0713	transcriptional regulator, MerR family protein	1.0126	0.868522
703	MSMEG_0714	acyl-CoA dehydrogenase	1.35093	0.266779
704	MSMEG_0715	3-oxoacyl-[acyl-carrier-protein] reductase	1.24923	0.0623716
705	MSMEG_0716	major facilitator superfamily protein	0.852628	0.524067
706	MSMEG_0717	aldose 1-epimerase subfamily protein	1.05643	0.569244
707	MSMEG_0718	acetyl-CoA synthetase	2.00489	0.24639
708	MSMEG_0719	flavohemoprotein	1.07624	0.749169
709	MSMEG_0720	integral membrane protein	0.829726	0.0745392
710	MSMEG_0721	RemQ protein; this gene contains a frame shift which is not the result of sequencing error	1.22176	0.587344
711	MSMEG_0721	RemQ protein; this gene contains a frame shift which is not the result of sequencing error	1.57464	0.452991
712	MSMEG_0722	conserved hypothetical protein	2.12325	0.220687
713	MSMEG_0723	conserved hypothetical protein	0.868149	0.509301
714	MSMEG_0725	IS1137, transposase orfB	0.774832	0.128272
715	MSMEG_0726	hypothetical protein	1.58973	0.0528086
716	MSMEG_0727	hypothetical protein	1.24498	0.43503
717	MSMEG_0728	hypothetical protein	1.76531	0.324746
718	MSMEG_0729	conserved hypothetical protein	1.48041	0.175046
719	MSMEG_0730	oleandomycin glycosyltransferase	1.35467	0.45551
720	MSMEG_0731	conserved hypothetical protein	1.12433	0.758159
721	MSMEG_0732	chaperone ClpB	0.857886	0.374802
722	MSMEG_0733	dihydrodipicolinate reductase, N-terminus domain protein	1.04624	0.753106
723	MSMEG_0734	Rieske [2Fe-2S] domain protein	1.363	0.387902
724	MSMEG_0735	putative transcriptional regulator	1.70193	0.0739187
725	MSMEG_0736	conserved hypothetical protein	0.802961	0.0799117
726	MSMEG_0737	dehydrogenase	1.35211	0.300316
727	MSMEG_0738	conserved hypothetical protein	1.75614	0.157687
728	MSMEG_0739	spou rRNA methylase family protein	1.1148	0.426573
729	MSMEG_0740	glycosyl hydrolase family protein 76	1.66523	0.327538
730	MSMEG_0741	conserved hypothetical protein	1.41806	0.454433
732	MSMEG_0743	xanthine dehydrogenase	0.868504	0.296312
733	MSMEG_0744	carbon monoxide dehydrogenase medium chain	0.866877	0.706933
734	MSMEG_0745	[2Fe-2S] binding domain protein	0.686571	0.114468
735	MSMEG_0746	carbon-monoxide dehydrogenase, large subunit	1.47826	0.306687
736	MSMEG_0747	carbon monoxide dehydrogenase F protein	1.38954	0.482636
737	MSMEG_0748	ATPase associated with various cellular activities, AAA_5	0.764407	0.0788861
738	MSMEG_0749	carbon monoxide dehydrogenase subunit G (CoxG) family protein	1.01793	0.93354
739	MSMEG_0750	membrane protein	0.957899	0.636913
740	MSMEG_0751	conserved hypothetical protein	1.29877	0.37347
741	MSMEG_0752	fructose-bisphosphate aldolase, class II	0.817973	0.398487
742	MSMEG_0753	conserved hypothetical protein	1.57645	0.111177
743	MSMEG_0754	conserved hypothetical protein	0.922571	0.124003
744	MSMEG_0755	cobalt-zinc-cadmium resistance protein	1.27624	0.603763
745	MSMEG_0756	peptidase, M50B family protein	0.90132	0.439716
746	MSMEG_0757	hypothetical protein	1.10507	0.758869
747	MSMEG_0758	conserved hypothetical protein	1.73275	0.0212242
748	MSMEG_0759	adenylosuccinate synthetase	2.07387	0.0524992
750	MSMEG_0761	conserved domain protein	1.02989	0.905832
751	MSMEG_0762	cytochrome P450 FAS1	0.945273	0.828713
752	MSMEG_0763	antibiotic transporter	1.68231	0.250541
753	MSMEG_0764	Na+/H+ antiporter	1.20231	0.495217
754	MSMEG_0765	zinc finger, UBP-type	1.00206	0.989128
755	MSMEG_0766	phosphoribosylglycinamide formyltransferase 2	1.31449	0.51883
756	MSMEG_0767	hypothetical protein	1.48286	0.301447
757	MSMEG_0768	conserved hypothetical protein	1.45105	0.32692
758	MSMEG_0769	O-succinylhomoserine sulfhydrylase	1.34782	0.171716
759	MSMEG_0770	hypothetical protein	0.989913	0.97089
760	MSMEG_0771	hypothetical oxidoreductase YqjQ	0.485647	0.117756
761	MSMEG_0772	phytase	0.410136	0.15736
762	MSMEG_0773	acetyltransferase	1.1621	0.460494
763	MSMEG_0774	flavin-dependent oxidoreductase; this gene contains a frame shift which is not the result of sequencing error	1.28612	0.579585
764	MSMEG_0775	metallo-beta-lactamase superfamily protein	0.69662	0.134711
765	MSMEG_0776	conserved hypothetical protein	0.729536	0.0923018
766	MSMEG_0777	F420-dependent glucose-6-phosphate dehydrogenase	0.800822	0.19162
767	MSMEG_0778	putative transcriptional regulator	1.08775	0.536594
768	MSMEG_0779	short-chain dehydrogenase/reductase SDR	1.2252	0.314178
769	MSMEG_0780	phosphotransferase enzyme family protein	1.61488	0.415773
770	MSMEG_0781	amino acid permease	1.35123	0.62986
771	MSMEG_0782	aminotransferase class-III	1.15486	0.74983
772	MSMEG_0783	phosphate acetyltransferase	1.64572	0.104968
773	MSMEG_0784	acetate kinase	0.913614	0.252304
774	MSMEG_0785	conserved hypothetical protein	1.39884	0.181534
775	MSMEG_0786	serine/threonine protein kinase	1.23514	0.224657
776	MSMEG_0787	Bacterial extracellular solute-binding protein, family protein 3	1.43422	0.0896887
777	MSMEG_0788	putative conserved membrane protein	1.48752	0.49094
778	MSMEG_0789	thiamine-phosphate pyrophosphorylase	0.919874	0.214482
779	MSMEG_0790	hydrolase, NUDIX family protein	0.888902	0.398441
780	MSMEG_0791	glycine oxidase ThiO	0.601506	0.0870406
781	MSMEG_0792	thiamine biosynthesis protein ThiS	0.692749	0.140889
782	MSMEG_0793	thiazole biosynthesis protein ThiG	0.572124	0.0207598
783	MSMEG_0794	conserved hypothetical protein	0.785371	0.0983833
784	MSMEG_0795	ABC transporter ATP-binding protein	0.833109	0.185214
785	MSMEG_0796	ABC transporter integral membrane subunit	1.00907	0.95418
786	MSMEG_0797	conserved hypothetical protein; this gene contains a frame shift which is not the result of sequencing error	0.93234	0.636266
787	MSMEG_0797	conserved hypothetical protein; this gene contains a frame shift which is not the result of sequencing error	1.15728	0.398335
788	MSMEG_0798	hypothetical protein	1.06712	0.515423
789	MSMEG_0799	hypothetical protein	0.795421	0.448741
790	MSMEG_0800	hypothetical protein	2.58904	0.0741762
791	MSMEG_0803	hypothetical protein	1.01855	0.899946
792	MSMEG_0803	hypothetical protein	1.23586	0.425878
793	MSMEG_0804	hypothetical protein	0.970592	0.895695
794	MSMEG_0805	conserved hypothetical protein	1.15254	0.702546
795	MSMEG_0806	hydrolase	1.11944	0.773536
796	MSMEG_0807	leupeptin-inactivating enzyme 1	0.997988	0.996672
797	MSMEG_0808	chalcone synthase	0.314367	0.0838785
798	MSMEG_0809	isoprenylcysteine carboxyl methyltransferase	0.340666	0.0645886
799	MSMEG_0810	putative pyrimidine permease RutG	1.66071	0.363675
801	MSMEG_0812	amino acid transporter	0.778388	0.439201
802	MSMEG_0813	conserved hypothetical protein	1.01148	0.960343
803	MSMEG_0814	membrane protein	1.88696	0.356085
804	MSMEG_0815	transcriptional regulator, TetR family protein	0.944844	0.758375
805	MSMEG_0816	flavin-binding monooxygenase	1.71041	0.432799
806	MSMEG_0817	LysR-family protein transcriptional regulator	1.36064	0.272136
807	MSMEG_0818	transporter, major facilitator family protein	1.05148	0.603171
808	MSMEG_0819	N-carbamoyl-L-amino acid amidohydrolase	1.32862	0.314563
809	MSMEG_0820	conserved hypothetical protein	0.808599	0.322954
810	MSMEG_0821	glutamyl-tRNA(Gln) amidotransferase subunit A	1.15167	0.462329
811	MSMEG_0822	cytochrome P450	0.923256	0.853954
812	MSMEG_0823	conserved hypothetical protein	1.01508	0.955578
813	MSMEG_0824	conserved hypothetical protein	1.5421	0.112343
814	MSMEG_0825	phosphomethylpyrimidine kinase	1.96247	0.0741204
815	MSMEG_0826	thiamine biosynthesis protein ThiC	1.76543	0.20075
816	MSMEG_0827	major facilitator superfamily protein MFS_1	0.889195	0.208323
817	MSMEG_0828	immunogenic protein MPT63	1.43284	0.343765
818	MSMEG_0829	exodeoxyribonuclease III	1.72063	0.104852
819	MSMEG_0830	acetyltransferase, gnat family protein	1.38774	0.318594
820	MSMEG_0831	short chain dehydrogenase	1.18684	0.0575506
821	MSMEG_0832	peptide deformylase	1.71474	0.246991
822	MSMEG_0833	conserved hypothetical protein	1.15728	0.000641467
823	MSMEG_0834	tuberculin related peptide	1.3177	0.087059
824	MSMEG_0835	copper/zinc superoxide dismutase	2.58126	0.181459
825	MSMEG_0836	carboxylate-amine ligase	2.00848	0.147888
826	MSMEG_0837	hypothetical protein	1.18754	0.338211
827	MSMEG_0838	AsnC-family protein transcriptional regulator	1.43033	0.461781
828	MSMEG_0839	ATP-dependent protease La (LON) domain subfamily protein	1.99825	0.422939
829	MSMEG_0840	hypothetical protein	1.90265	0.166678
831	MSMEG_0842	hypothetical protein	2.36639	0.0521833
832	MSMEG_0843	multisubunit Na+/H+ antiporter, G subunit	1.59197	0.0602219
833	MSMEG_0844	multiple resistance and pH regulation protein F	1.80114	0.273615
834	MSMEG_0845	multisubunit Na+/H+ antiporter	1.6091	0.172017
835	MSMEG_0846	NADH-ubiquinone oxidoreductase/multisubunit na+/h+ antiporter, d subunit	1.28317	0.108101
836	MSMEG_0847	NADH-ubiquinone/plastoquinone oxidoreductase chain 4l family protein	1.61323	0.225377
837	MSMEG_0848	NADH ubiquinone oxidoreductase subunit 5	0.951448	0.858699
838	MSMEG_0849	oxygenase	1.28388	0.623926
839	MSMEG_0850	conserved hypothetical protein	1.38728	0.173763
840	MSMEG_0851	Citrate transporter	0.891379	0.455451
841	MSMEG_0852	CBS domain protein	0.708406	0.22541
842	MSMEG_0853	conserved hypothetical protein	0.871002	0.629414
843	MSMEG_0854	two-component system sensor kinase	1.12279	0.772969
844	MSMEG_0855	conserved hypothetical protein	0.902148	0.369164
845	MSMEG_0856	DNA-binding response regulator, LuxR family protein	0.889158	0.102576
846	MSMEG_0857	conserved hypothetical protein	1.51227	0.321996
847	MSMEG_0858	cell division control protein Cdc48	1.31196	0.381295
848	MSMEG_0859	transcriptional regulator, TetR family protein	1.0853	0.756131
849	MSMEG_0860	CDP-diacylglycerol--serine O-phosphatidyltransferase	1.20026	0.358372
850	MSMEG_0861	phosphatidylserine decarboxylase	1.33827	0.375987
851	MSMEG_0862	molybdopterin biosynthesis protein MoeA	1.42287	0.422066
852	MSMEG_0863	short chain dehydrogenase	1.26629	0.39216
853	MSMEG_0864	bacterial membrane flanked domain family protein	1.06899	0.231724
854	MSMEG_0865	bacterial membrane flanked domain family protein	1.14097	0.714843
855	MSMEG_0866	DNA or RNA helicase of superfamily protein II	1.29482	0.338885
856	MSMEG_0867	hydrolase	1.5019	0.28169
857	MSMEG_0868	hypothetical protein	0.882307	0.428534
858	MSMEG_0869	hypothetical protein	0.948735	0.931135
859	MSMEG_0870	oxidoreductase	0.84026	0.815828
860	MSMEG_0871	putative aldehyde or xanthine dehydrogenase, molybdopterin binding subunit protein	0.479881	0.0958151
861	MSMEG_0872	twin-arginine translocation pathway signal	0.642258	0.242897
862	MSMEG_0873	hypothetical protein	0.957008	0.875516
863	MSMEG_0874	transcriptional regulator, GntR family protein	0.987592	0.958505
864	MSMEG_0875	putative sialic acid transporter	1.66615	0.360635
865	MSMEG_0876	short chain dehydrogenase	2.57265	0.11451
866	MSMEG_0877	dihydrodipicolinate synthase	1.26086	0.705129
867	MSMEG_0878	transcriptional regulator	0.82974	0.392311
868	MSMEG_0879	hypothetical protein	1.11735	0.753152
869	MSMEG_0880	chaperonin GroL	2.62568	0.231651
870	MSMEG_0881	conserved hypothetical protein	2.11322	0.318123
871	MSMEG_0882	conserved hypothetical protein	0.496062	0.069123
872	MSMEG_0883	amidohydrolase family protein	0.583911	0.30007
873	MSMEG_0884	glyoxalase family protein	1.27822	0.00913737
874	MSMEG_0885	conserved hypothetical protein	0.83189	0.187349
875	MSMEG_0886	serine/threonine-protein kinase PknD	0.598077	0.213812
877	MSMEG_0888	conserved hypothetical protein	0.83231	0.334775
878	MSMEG_0889	succinic semialdehyde dehydrogenase	1.56241	0.247701
879	MSMEG_0890	HD domain protein	1.02332	0.938112
880	MSMEG_0891	polyphosphate kinase 2	1.18768	0.284151
881	MSMEG_0892	conserved hypothetical protein	1.68186	0.378536
882	MSMEG_0893	hypothetical protein	0.949279	0.751084
883	MSMEG_0894	dihydrodipicolinate reductase	1.7652	0.398064
884	MSMEG_0895	bacterial regulatory protein, GntR family protein	0.860181	0.449063
885	MSMEG_0896	integral membrane transport protein	1.08423	0.589499
886	MSMEG_0897	conserved hypothetical protein	1.31142	0.52388
887	MSMEG_0898	tagatose-1,6-bisphosphate aldolase GatY	0.842636	0.127889
888	MSMEG_0899	prolyl oligopeptidase family protein	1.28428	0.169873
889	MSMEG_0900	eptc-inducible aldehyde dehydrogenase	1.17048	0.618937
890	MSMEG_0901	conserved hypothetical protein	1.53127	0.0517543
891	MSMEG_0902	cyclopropane-fatty-acyl-phospholipid synthase 1	0.467838	0.0980618
892	MSMEG_0903	dihydrolipoamide dehydrogenase	1.98732	0.269864
893	MSMEG_0904	probable conserved membrane protein	1.47583	0.396853
894	MSMEG_0905	4-carboxymuconolactone decarboxylase domain protein	0.864545	0.12836
895	MSMEG_0906	DNA-binding protein	1.39796	0.590267
896	MSMEG_0907	conserved hypothetical protein	0.862232	0.174983
897	MSMEG_0908	hypothetical protein	1.22	0.274988
898	MSMEG_0909	acyl-ACP thioesterase superfamily protein	0.981067	0.924516
899	MSMEG_0910	hypothetical protein	1.10951	0.134343
900	MSMEG_0911	isocitrate lyase	1.14475	0.692956
901	MSMEG_0912	3-hydroxybutyryl-CoA dehydrogenase	2.35091	0.0570873
902	MSMEG_0913	methoxy mycolic acid synthase 1	1.96721	0.197827
903	MSMEG_0914	conserved hypothetical protein	1.36035	0.174572
904	MSMEG_0915	polyphosphate kinase 2 superfamily protein	1.7441	0.209769
905	MSMEG_0916	transcriptional regulator, TetR family protein	0.781103	0.266633
906	MSMEG_0917	conserved hypothetical protein	0.62814	0.139626
907	MSMEG_0918	transcriptional regulator, XRE family protein	0.902472	0.456547
908	MSMEG_0919	heparin-binding hemagglutinin	0.763818	0.078698
909	MSMEG_0920	conserved hypothetical protein	0.741805	0.177193
910	MSMEG_0921	conserved hypothetical protein	0.907034	0.373616
911	MSMEG_0922	deoxyribose-phosphate aldolase	1.06919	0.573817
912	MSMEG_0923	conserved hypothetical protein	1.26741	0.340897
913	MSMEG_0924	hydrolase, carbon-nitrogen family protein	0.96697	0.884474
914	MSMEG_0925	conserved hypothetical protein	1.35105	0.551318
915	MSMEG_0926	conserved hypothetical protein	1.43166	0.32937
916	MSMEG_0927	conserved hypothetical protein	1.20003	0.569886
917	MSMEG_0928	UDP-N-acetylenolpyruvoylglucosamine reductase	2.11263	0.405476
918	MSMEG_0929	ErfK/YbiS/YcfS/YnhG family protein	0.779299	0.00964141
919	MSMEG_0930	serine 3-dehydrogenase	1.15207	0.01362
920	MSMEG_0931	hypothetical protein	1.56655	0.292652
921	MSMEG_0932	ROK family protein	5.31754	0.0523999
922	MSMEG_0933	conserved hypothetical protein	0.518563	0.139148
923	MSMEG_0934	conserved hypothetical protein	0.607995	0.089266
924	MSMEG_0935	2,3-bisphosphoglycerate-dependent phosphoglycerate mutase	2.16752	0.120928
925	MSMEG_0936	sensor histidine kinase SenX3	0.861916	0.199691
926	MSMEG_0937	DNA-binding response regulator RegX3	0.74997	0.00239122
927	MSMEG_0938	conserved hypothetical protein	0.742192	0.351724
928	MSMEG_0939	Ppx/GppA phosphatase family protein	0.618416	0.131545
929	MSMEG_0940	conserved hypothetical protein	0.812839	0.383604
930	MSMEG_0941	AP endonuclease, family protein 2	1.90499	0.439853
931	MSMEG_0942	conserved hypothetical protein	0.971474	0.817349
932	MSMEG_0943	pyrroline-5-carboxylate reductase	1.81855	0.20278
933	MSMEG_0944	DNA binding domain, excisionase family protein	1.23718	0.0986769
934	MSMEG_0945	conserved domain protein	3.04678	0.249961
935	MSMEG_0946	NAD dependent epimerase/dehydratase family protein	1.10979	0.418417
936	MSMEG_0947	acyltransferase	1.07986	0.554141
937	MSMEG_0948	conserved hypothetical protein	1.50547	0.194253
938	MSMEG_0949	HAD-superfamily protein subfamily protein IB hydrolase, TIGR01490	0.866967	0.5041
939	MSMEG_0950	hypothetical protein	1.21792	0.575334
940	MSMEG_0951	glutaredoxin 2	1.31695	0.207689
941	MSMEG_0952	glutamyl-tRNA reductase	1.43437	0.045192
942	MSMEG_0953	porphobilinogen deaminase	1.25013	0.288966
943	MSMEG_0954	uroporphyrinogen-III synthase	2.18538	0.0821582
944	MSMEG_0955	hypothetical protein	1.41717	0.187805
945	MSMEG_0956	delta-aminolevulinic acid dehydratase	1.42363	0.0582414
946	MSMEG_0957	hypothetical protein	1.03338	0.896981
947	MSMEG_0958	hypothetical protein	0.923874	0.692954
948	MSMEG_0959	putative conserved transmembrane protein	1.11476	0.346384
949	MSMEG_0960	putative transmembrane protein	1.34761	0.179976
950	MSMEG_0961	conserved hypothetical protein; this gene contains a frame shift which is not the result of sequencing error	1.06888	0.818336
951	MSMEG_0962	TetR-family protein transcriptional regulator	1.03115	0.878426
952	MSMEG_0963	hypothetical protein	1.03502	0.891821
953	MSMEG_0964	pyridoxamine 5'-phosphate oxidase family protein	1.19472	0.515762
954	MSMEG_0965	porin	6.67328	0.120913
955	MSMEG_0966	conserved hypothetical protein	0.894895	0.642811
956	MSMEG_0967	conserved hypothetical protein	0.613401	0.104961
957	MSMEG_0968	cytochrome P450	1.43303	0.574377
958	MSMEG_0969	glutamate-1-semialdehyde-2,1-aminomutase	0.63856	0.0575709
959	MSMEG_0970	phosphoglycerate mutase family protein	0.869575	0.534531
960	MSMEG_0971	conserved hypothetical protein	0.821378	0.325032
961	MSMEG_0972	cytochrome C biogenesis protein transmembrane region	0.794106	0.13505
962	MSMEG_0973	conserved membrane protein	0.786199	0.139535
963	MSMEG_0974	cytochrome c-type biogenesis protein CcsB	0.895971	0.48033
964	MSMEG_0975	conserved hypothetical protein	1.07964	0.687613
965	MSMEG_0976	conserved hypothetical protein	0.669754	0.229616
966	MSMEG_0977	conserved hypothetical protein	0.801708	0.284962
967	MSMEG_0978	aminotransferase, class V superfamily protein	1.50785	0.587318
969	MSMEG_0980	signal transduction histidine kinase	0.570225	0.0684009
970	MSMEG_0981	two-component system regulator	0.422946	0.114809
971	MSMEG_0982	immunogenic protein	0.847981	0.602986
972	MSMEG_0983	two-component system response regulator	1.14863	0.403839
973	MSMEG_0984	trap transporter, 4tm/12tm fusion protein	1.00242	0.991427
974	MSMEG_0985	sugar transporter family protein	2.04187	0.225369
975	MSMEG_0986	RemM protein	1.62967	0.307974
976	MSMEG_0987	hypothetical protein	1.31592	0.0753898
977	MSMEG_0988	1,4-dihydroxy-2-naphthoate octaprenyltransferase	1.23073	0.710654
978	MSMEG_0989	conserved hypothetical protein	0.982712	0.873946
979	MSMEG_0990	methylthioadenosine phosphorylase	0.905509	0.497042
980	MSMEG_0991	NAD-dependent epimerase/dehydratase	0.861176	0.220741
981	MSMEG_0992	2-nitropropane dioxygenase, NPD	1.43112	0.338119
982	MSMEG_0993	histidine kinase	0.810867	0.344085
983	MSMEG_0994	DNA-binding response regulator ResD	0.709035	0.168614
984	MSMEG_0995	glycosyl transferase, family protein 2	0.448093	0.0829062
985	MSMEG_0996	conserved hypothetical protein	0.932218	0.875794
986	MSMEG_0997	conserved hypothetical protein	0.572444	0.0506048
987	MSMEG_0998	oxidoreductase, molybdopterin binding	0.771586	0.546899
988	MSMEG_0999	integral membrane protein	0.419195	0.0738205
989	MSMEG_1000	hypothetical protein	0.733422	0.0873326
990	MSMEG_1001	acetyltransferase, gnat family protein, putative	1.62416	0.0780142
991	MSMEG_1004	This is the transposed copy of the gene fragment that was disrupted by an IS1096 element elsewhere in the chromosome.; conserved hypothetical protein, interruption-N; identified by similarity to OMNI:NTL02MT01721	0.788308	0.110658
992	MSMEG_1060	putative Lsr2 protein	0.973727	0.874331
993	MSMEG_1061	phosphohydrolase	0.949808	0.19017
994	MSMEG_1062	O-succinylbenzoic acid--CoA ligase	0.69152	0.0801219
995	MSMEG_1063	conserved hypothetical protein	0.651406	0.017961
996	MSMEG_1064	phosphate/sulphate permease	0.88708	0.567665
997	MSMEG_1065	conserved hypothetical protein	0.733103	0.0795047
998	MSMEG_1066	conserved hypothetical protein	0.590546	0.00714248
999	MSMEG_1067	conserved hypothetical protein	1.1026	0.618686
1000	MSMEG_1068	regulatory protein	1.67459	0.125955
1001	MSMEG_1069	amino acid permease-associated region	1.10321	0.466342
1002	MSMEG_1070	3-oxoacyl-[acyl-carrier-protein] reductase	1.32332	0.528985
1003	MSMEG_1071	3-oxoacyl-[acyl-carrier-protein] reductase	0.959138	0.804786
1004	MSMEG_1072	agmatinase	1.91536	0.382202
1005	MSMEG_1073	oxidoreductase, short-chain dehydrogenase/reductase family protein	1.26859	0.268954
1006	MSMEG_1074	polysaccharide deacetylase	1.25873	0.284568
1007	MSMEG_1075	naphthoate synthase	0.999567	0.997742
1008	MSMEG_1076	conserved hypothetical protein	0.981405	0.946461
1009	MSMEG_1077	conserved hypothetical protein	0.777347	0.137575
1010	MSMEG_1078	hydrolase	0.589379	0.0935768
1011	MSMEG_1079	hypothetical protein	1.51253	0.239166
1012	MSMEG_1080	large subunit of N,N-dimethylformamidase	0.967449	0.850078
1013	MSMEG_1081	hypothetical protein	1.24005	0.216448
1014	MSMEG_1082	putative response regulator	1.03331	0.745242
1015	MSMEG_1083	hypothetical protein	1.64392	0.154148
1016	MSMEG_1084	peptide/opine/nickel uptake family protein ABC transporter, periplasmic substrate-binding protein, putative	1.65452	0.325748
1017	MSMEG_1085	dipeptide transport system permease protein DppB	1.32267	0.352695
1018	MSMEG_1086	ABC transporter permease protein	1.23575	0.56326
1019	MSMEG_1087	oligopeptide ABC transporter ATP-binding protein; this gene contains a frame shift which is not the result of sequencing error; identified by match to protein family HMM PF00005	0.912709	0.643225
1020	MSMEG_1087	oligopeptide ABC transporter ATP-binding protein; this gene contains a frame shift which is not the result of sequencing error; identified by match to protein family HMM PF00005	1.18051	0.455641
1021	MSMEG_1088	glutamyl-tRNA(Gln)/aspartyl-tRNA(Asn) amidotransferase, A subunit	0.883304	0.510782
1022	MSMEG_1089	hypothetical protein	1.04383	0.767719
1023	MSMEG_1090	amidase	1.07286	0.734267
1024	MSMEG_1091	urease accessory protein UreE 1	0.802039	0.10199
1025	MSMEG_1092	urease accessory protein UreF	0.942705	0.788922
1026	MSMEG_1093	urease gamma/beta subunit	1.18099	0.270862
1027	MSMEG_1094	urease, alpha subunit	1.67461	0.171088
1028	MSMEG_1095	urease accessory protein UreG	1.27721	0.555264
1029	MSMEG_1096	urease accessory protein UreD, putative	1.34855	0.344442
1030	MSMEG_1097	glycosyl transferase, group 2 family protein	0.982209	0.960898
1031	MSMEG_1098	acyl-CoA synthase	0.811826	0.51822
1032	MSMEG_1099	hypothetical protein	1.19628	0.302338
1033	MSMEG_1100	dgpf protein	1.32446	0.510071
1034	MSMEG_1101	hypothetical protein	0.560367	0.326042
1035	MSMEG_1102	twin-arginine translocation pathway signal	0.608207	0.17656
1036	MSMEG_1103	O-succinylbenzoate synthase	1.11815	0.671907
1037	MSMEG_1104	hypothetical protein	1.08287	0.621754
1038	MSMEG_1105	phthiodiolone ketoreductase; this gene contains a frame shift which is not the result of sequencing error	0.945487	0.82234
1039	MSMEG_1105	phthiodiolone ketoreductase; this gene contains a frame shift which is not the result of sequencing error	1.18044	0.542247
1040	MSMEG_1106	transcriptional regulator, AraC family protein	1.28548	0.523921
1041	MSMEG_1107	isonitrile hydratase, putative	0.759372	0.269298
1042	MSMEG_1108	hydrolase, alpha/beta fold family protein	1.4565	0.372432
1043	MSMEG_1109	2-oxoglutarate decarboxylase	0.843159	0.251131
1044	MSMEG_1110	probable conserved transmembrane protein	1.23456	0.447047
1045	MSMEG_1111	conserved hypothetical protein	1.32412	0.225845
1046	MSMEG_1112	aconitate hydratase, putative	1.15383	0.68539
1047	MSMEG_1113	glycosyl transferase	1.21534	0.360919
1048	MSMEG_1114	short chain dehydrogenase	0.562784	0.0809545
1049	MSMEG_1115	menaquinone biosynthesis methyltransferase UbiE	1.20261	0.410604
1050	MSMEG_1116	gamma-glutamylisopropylamide synthetase	1.57806	0.31301
1051	MSMEG_1117	transcriptional regulator	1.3181	0.137947
1052	MSMEG_1118	amino acid permease	0.9449	0.663757
1053	MSMEG_1119	glutamine amidotransferase, class I	1.00142	0.991751
1054	MSMEG_1120	nitrilase/cyanide hydratase and apolipoprotein N-acyltransferase	1.45533	0.273586
1055	MSMEG_1121	conserved hypothetical protein	1.16792	0.624644
1056	MSMEG_1122	hypothetical protein	0.91429	0.593007
1057	MSMEG_1123	cobalamin synthesis protein	1.45127	0.20111
1058	MSMEG_1124	putative ferredoxin FdxA	1.41825	0.127816
1059	MSMEG_1125	regulatory protein, ArsR	1.20171	0.607016
1060	MSMEG_1126	hypothetical protein	0.744124	0.2428
1061	MSMEG_1127	probable conserved transmembrane protein	1.51151	0.263378
1062	MSMEG_1128	conserved hypothetical protein	1.71361	0.528847
1063	MSMEG_1129	D-amino-acid dehydrogenase	0.943457	0.775285
1064	MSMEG_1130	hypothetical protein	1.50068	0.349627
1065	MSMEG_1131	tryptophan-rich sensory protein	0.630756	0.0478441
1066	MSMEG_1132	FAD binding domain, putative	1.41917	0.47975
1067	MSMEG_1133	bifunctional short chain isoprenyl diphosphate synthase	1.82611	0.358351
1068	MSMEG_1134	putative protease HtpX	1.08708	0.593872
1069	MSMEG_1135	hypothetical protein	1.43575	0.48052
1070	MSMEG_1136	conserved hypothetical protein	1.41209	0.323095
1071	MSMEG_1137	amino acid permease-associated region	1.27095	0.343235
1072	MSMEG_1138	alcohol dehydrogenase 1	1.69994	0.113278
1073	MSMEG_1139	transcription regulator	1.19496	0.0843901
1074	MSMEG_1140	glycerol-3-phosphate dehydrogenase 2 [NAD(P)+] (NAD(P)H-dependent glycerol-3-phosphate dehydrogenase 2)	0.89663	0.519395
1075	MSMEG_1141	ABC-transporter integral membrane protein	1.70479	0.137388
1076	MSMEG_1142	ABC-transporter integral membrane protein	1.22804	0.22352
1077	MSMEG_1143	mce related protein	1.57684	0.29034
1078	MSMEG_1144	virulence factor Mce family protein	1.14735	0.562825
1079	MSMEG_1145	virulence factor Mce family protein	1.11731	0.551662
1080	MSMEG_1146	virulence factor Mce family protein	1.87424	0.439588
1081	MSMEG_1147	mce related protein	1.1449	0.478219
1082	MSMEG_1148	mce related protein	1.25713	0.446548
1083	MSMEG_1149	conserved hypothetical protein	1.18983	0.0271047
1084	MSMEG_1150	conserved hypothetical protein	1.24366	0.109365
1085	MSMEG_1151	DNA-binding protein	0.955109	0.607757
1086	MSMEG_1152	citrate-proton symporter	1.29567	0.183018
1087	MSMEG_1153	FAD dependent oxidoreductase	1.05217	0.826817
1088	MSMEG_1154	formyl-coenzyme A transferase	1.23967	0.369161
1089	MSMEG_1155	carnitinyl-CoA dehydratase	1.38809	0.375274
1090	MSMEG_1156	dihydrodipicolinate synthetase	1.26065	0.242916
1091	MSMEG_1157	short chain dehydrogenase	1.26636	0.47772
1092	MSMEG_1158	5-oxovalerate dehydrogenase	0.967132	0.872733
1093	MSMEG_1159	ABC transporter component A	1.25683	0.315591
1094	MSMEG_1160	ABC-type nitrate/sulfonate/bicarbonate transport system ATPase component	1.09935	0.556851
1095	MSMEG_1161	taurine transport system permease protein TauC	1.14413	0.560908
1096	MSMEG_1162	nitrilotriacetate monooxygenase component A	1.05239	0.847066
1097	MSMEG_1163	hypothetical protein	1.95297	0.174239
1098	MSMEG_1164	putative transporter; this region contains one or more premature stops and/or frameshifts which are not the result of sequencing error	1.11963	0.712782
1099	MSMEG_1164	putative transporter; this region contains one or more premature stops and/or frameshifts which are not the result of sequencing error	1.13593	0.756708
1100	MSMEG_1164	putative transporter; this region contains one or more premature stops and/or frameshifts which are not the result of sequencing error	1.46657	0.448024
1101	MSMEG_1165	conserved hypothetical protein	1.04952	0.803012
1102	MSMEG_1167	cytochrome P450	1.54773	0.345401
1103	MSMEG_1168	putative transcriptional regulator	0.962587	0.827923
1104	MSMEG_1169	integral membrane transport protein	1.7947	0.537933
1105	MSMEG_1170	conserved domain protein	1.08835	0.816966
1106	MSMEG_1171	Low molecular weight phosphotyrosine protein phosphatase	1.16587	0.620855
1107	MSMEG_1172	arsenical-resistance protein	1.2543	0.185731
1108	MSMEG_1173	transcriptional regulator, ArsR family protein	1.03425	0.818641
1109	MSMEG_1174	cadmium inducible protein cadi	1.00337	0.975024
1110	MSMEG_1175	putative transcriptional regulatory protein	0.990148	0.975422
1111	MSMEG_1176	hypothetical protein	1.94276	0.371102
1112	MSMEG_1177	cytosine/purines/uracil/thiamine/allantoin permease family protein	0.949155	0.84733
1113	MSMEG_1178	transcriptional regulator	1.88884	0.306638
1114	MSMEG_1179	urocanate hydratase	0.878151	0.688327
1115	MSMEG_1180	N-carbamoyl-L-amino acid hydrolase	0.972854	0.922023
1116	MSMEG_1181	formiminoglutamate deiminase	1.32205	0.579463
1117	MSMEG_1182	imidazolonepropionase	1.49673	0.37709
1118	MSMEG_1183	histidine ammonia-lyase	1.31717	0.403511
1119	MSMEG_1184	serine esterase, cutinase family protein	0.823216	0.501816
1120	MSMEG_1185	transcriptional regulator, AsnC family protein	0.990703	0.952447
1121	MSMEG_1186	putative permease	1.19871	0.512979
1122	MSMEG_1187	N-acyl-D-aspartate deacylase	1.23975	0.612602
1123	MSMEG_1188	conserved hypothetical protein	1.00346	0.975309
1124	MSMEG_1189	conserved hypothetical protein	1.14498	0.729615
1125	MSMEG_1190	serine/threonine-protein kinase PknD	1.74983	0.182195
1126	MSMEG_1191	hypothetical protein	1.21574	0.392722
1127	MSMEG_1192	M23 peptidase domain protein	1.0953	0.722222
1128	MSMEG_1193	TROVE domain protein	1.71424	0.154554
1129	MSMEG_1194	hypothetical protein	0.983058	0.88819
1130	MSMEG_1195	conserved hypothetical protein	1.09454	0.398927
1131	MSMEG_1196	SNF2 domain protein	1.01085	0.964674
1132	MSMEG_1197	transcriptional regulator, LuxR family protein	0.928346	0.826933
1133	MSMEG_1198	hypothetical protein	1.20715	0.153009
1134	MSMEG_1199	conserved hypothetical protein	0.821566	0.488824
1135	MSMEG_1200	serine/threonine-protein kinase PknD	1.14568	0.641845
1136	MSMEG_1201	hypothetical protein	1.85232	0.127017
1137	MSMEG_1202	hypothetical protein	1.02331	0.944313
1139	MSMEG_1204	3-oxoacyl-[acyl-carrier-protein] synthase 2	0.527762	0.0922303
1140	MSMEG_1205	cyclopropane-fatty-acyl-phospholipid synthase 1	0.507238	0.0994713
1141	MSMEG_1206	hypothetical protein	0.856665	0.649006
1142	MSMEG_1207	glycosyltransferase, group I	4.40128	0.374341
1143	MSMEG_1208	glycosyltransferase, group I	1.07423	0.58463
1144	MSMEG_1209	glycosidase	0.959749	0.889585
1145	MSMEG_1210	conserved hypothetical protein	2.11505	0.338101
1146	MSMEG_1211	Fatty acid desaturase	1.01965	0.830274
1147	MSMEG_1212	hypothetical protein	1.30143	0.589651
1148	MSMEG_1213	cytochrome P450 monooxygenase	0.927602	0.814113
1149	MSMEG_1214	oxidoreductase	1.12636	0.857132
1150	MSMEG_1215	serine/threonine-protein kinase PknE, putative	0.819729	0.325452
1151	MSMEG_1216	ABC-type transport system periplasmic substrate-binding protein	1.25974	0.466595
1152	MSMEG_1217	ABC-type transport system ATP-binding protein I	1.56935	0.0417659
1153	MSMEG_1218	ABC-type transport system ATP-binding protein II	1.32333	0.126815
1154	MSMEG_1219	ABC-type transport system permease protein II	1.25106	0.211231
1155	MSMEG_1220	ABC-type transport system permease protein I	1.42329	0.118339
1156	MSMEG_1221	rifampin ADP-ribosyl transferase	1.88391	0.308132
1157	MSMEG_1222	ISMsm6, transposase	1.26301	0.521542
1158	MSMEG_1223	hypothetical protein	0.944999	0.317806
1159	MSMEG_1224	rifampin ADP-ribosyl transferase	1.29004	0.571464
1160	MSMEG_1225	conserved hypothetical protein	1.43452	0.548485
1161	MSMEG_1226	sulfatase-modifying factor 1	1.82508	0.167403
1162	MSMEG_1227	transcriptional regulator, GntR family protein	1.27995	0.136918
1163	MSMEG_1228	sulfatase	1.20972	0.40318
1164	MSMEG_1229	DNA gyrase, B subunit	0.970485	0.898558
1165	MSMEG_1230	hypothetical protein	0.966826	0.901676
1166	MSMEG_1231	inner membrane protein YidH	1.56652	0.432855
1167	MSMEG_1232	ABC transporter substrate-binding protein	1.19646	0.123833
1168	MSMEG_1233	ABC transporter permease protein; this gene contains a frame shift which is not the result of sequencing error	0.998559	0.994663
1169	MSMEG_1234	taurine import ATP-binding protein TauB	1.00255	0.987826
1170	MSMEG_1235	sulfate permease	0.967537	0.724775
1171	MSMEG_1236	Mpr protein	2.02336	0.473535
1172	MSMEG_1237	hypothetical protein	0.985389	0.939823
1173	MSMEG_1238	type III restriction enzyme, res subunit	1.09791	0.573342
1174	MSMEG_1240	conserved hypothetical protein	1.30491	0.217368
1175	MSMEG_1241	conserved hypothetical protein	1.72892	0.129419
1176	MSMEG_1242	cysteine desulfurase IscS	2.15149	0.357123
1177	MSMEG_1243	conserved hypothetical protein	1.47423	0.233082
1178	MSMEG_1244	conserved hypothetical protein	1.18521	0.163732
1179	MSMEG_1245	phosphoadenosine phosphosulfate reductase	1.31189	0.364564
1180	MSMEG_1246	conserved hypothetical protein	1.13833	0.595539
1181	MSMEG_1247	conserved hypothetical protein	1.50635	0.115771
1182	MSMEG_1248	hypothetical protein	1.28188	0.260665
1183	MSMEG_1249	ISMsm7, transposase orfB	2.70072	0.294834
1184	MSMEG_1250	ISMsm7, transposase orfA	1.08084	0.693592
1185	MSMEG_1251	conserved hypothetical protein	1.40821	0.498255
1186	MSMEG_1252	conserved hypothetical protein	1.35993	0.229116
1187	MSMEG_1253	conserved hypothetical protein	1.30544	0.0941722
1188	MSMEG_1254	DEAD/DEAH box helicase	1.1325	0.484873
1189	MSMEG_1255	UvrD/Rep helicase	1.33607	0.418017
1190	MSMEG_1256	hypothetical protein	1.06227	0.474655
1191	MSMEG_1259	hypothetical protein	1.58167	0.308254
1192	MSMEG_1260	hypothetical protein	1.76373	0.0210243
1193	MSMEG_1261	hypothetical protein	1.68594	0.294366
1194	MSMEG_1262	conserved hypothetical protein	1.13898	0.380758
1195	MSMEG_1263	conserved hypothetical protein	1.3312	0.119566
1196	MSMEG_1264	prophage Lp1 protein 5	1.31546	0.320137
1197	MSMEG_1265	conserved hypothetical protein	1.47206	0.163705
1198	MSMEG_1266	ankyrin-repeat containing protein	1.07266	0.806943
1199	MSMEG_1267	putative ribosylglycohydrolase; this gene contains a frame shift which is not the result of sequencing error; identified by match to protein family HMM PF00782	1.02821	0.880407
1200	MSMEG_1268	nudix hydrolase	0.817242	0.314696
1201	MSMEG_1269	Ser/Thr protein phosphatase family protein	0.828536	0.219552
1202	MSMEG_1270	hypothetical protein	1.34616	0.368413
1203	MSMEG_1271	hypothetical protein	1.38358	0.329571
1204	MSMEG_1272	putative ribosylglycohydrolase	1.39112	0.559047
1205	MSMEG_1273	conserved hypothetical protein	1.0399	0.823942
1206	MSMEG_1274	gluconolactonase	1.41454	0.463463
1207	MSMEG_1275	HNH nuclease, putative	0.759618	0.38095
1208	MSMEG_1276	hypothetical protein	0.94498	0.67523
1209	MSMEG_1277	hypothetical protein	0.816907	0.378486
1210	MSMEG_1278	death-on-curing protein	1.22598	0.517731
1211	MSMEG_1279	conserved hypothetical protein	0.923906	0.80935
1212	MSMEG_1280	hypothetical cytosolic protein	0.814664	0.157538
1213	MSMEG_1281	conserved hypothetical protein	1.1991	0.207215
1214	MSMEG_1282	hypothetical cytosolic protein	1.13625	0.749677
1215	MSMEG_1283	probable ribbon-helix-helix transcription factor, family protein	0.909207	0.289152
1216	MSMEG_1284	PIN domain protein	0.917595	0.401082
1217	MSMEG_1285	tetratricopeptide repeat family protein	1.30553	0.449044
1218	MSMEG_1286	sulfatase family protein	1.12345	0.669962
1219	MSMEG_1287	cyclase/dehydrase superfamily protein	0.984067	0.958316
1220	MSMEG_1288	conserved hypothetical protein	1.3612	0.325358
1221	MSMEG_1289	conserved hypothetical protein	0.965258	0.878671
1222	MSMEG_1290	dihydroxy-acid dehydratase	1.49023	0.195858
1225	MSMEG_1293	xanthine/uracil permeases family protein	1.20285	0.530708
1226	MSMEG_1294	allantoicase	0.925424	0.767612
1227	MSMEG_1295	transthyretin	1.11362	0.746518
1228	MSMEG_1296	uricase	0.920782	0.763004
1229	MSMEG_1297	hydroxydechloroatrazine ethylaminohydrolase	1.73671	0.523989
1230	MSMEG_1298	guanine deaminase	1.17216	0.510147
1231	MSMEG_1299	oxidoreductase, 2OG-Fe(II) oxygenase family protein	2.02497	0.300513
1232	MSMEG_1300	hypothetical protein	1.32078	0.437701
1233	MSMEG_1301	NanT3	1.59041	0.131061
1234	MSMEG_1302	alkylphosphonate uptake protein	1.44724	0.411739
1235	MSMEG_1303	putative transcriptional regulator	0.996947	0.988281
1236	MSMEG_1304	rhizopine catabolism protein	0.707686	0.135841
1237	MSMEG_1305	TetR family protein regulatory protein	2.81882	0.147175
1238	MSMEG_1306	aldehyde dehydrogenase (NAD) family protein	1.64728	0.389237
1239	MSMEG_1307	EthD protein	1.1393	0.670237
1240	MSMEG_1308	peptidase S15	1.92086	0.142827
1241	MSMEG_1309	conserved hypothetical protein	1.05643	0.807208
1242	MSMEG_1311	oligopeptide transporter, OPT family protein	0.569631	0.0320139
1243	MSMEG_1312	hypothetical protein	1.30156	0.309698
1244	MSMEG_1313	secreted protein	1.25045	0.46439
1245	MSMEG_1314	hypothetical protein	0.957187	0.803156
1246	MSMEG_1315	transporter, small conductance mechanosensitive ion channel (MscS) family protein	1.30378	0.472506
1247	MSMEG_1316	peptide chain release factor 3	1.8357	0.138988
1248	MSMEG_1317	transcriptional regulator	1.14232	0.128144
1249	MSMEG_1318	polysaccharide deacetylase family protein	0.735339	0.0192495
1250	MSMEG_1319	Asp/Glu racemase	1.99354	0.398353
1251	MSMEG_1320	major facilitator superfamily protein MFS_1	0.904658	0.540745
1252	MSMEG_1321	5-carboxymethyl-2-hydroxymuconate delta-isomerase	1.08551	0.743294
1253	MSMEG_1322	ErfK/YbiS/YcfS/YnhG family protein	1.39071	0.294002
1254	MSMEG_1323	hypothetical protein	1.09646	0.825789
1255	MSMEG_1324	hypothetical protein	1.65335	0.388042
1256	MSMEG_1325	exodeoxyribonuclease V, alpha subunit	1.01484	0.940661
1257	MSMEG_1326	hypothetical protein	1.58311	0.356069
1258	MSMEG_1327	exodeoxyribonuclease V, beta subunit	0.971004	0.94377
1259	MSMEG_1328	exodeoxyribonuclease V, gamma subunit	1.14442	0.582212
1260	MSMEG_1329	major facilitator superfamily protein MFS_1, putative	1.60133	0.269667
1261	MSMEG_1330	MarR-family protein transcriptional regulator	1.40395	0.13547
1262	MSMEG_1331	enoyl-CoA hydratase	1.97226	0.15961
1263	MSMEG_1332	conserved hypothetical protein	1.51109	0.0992983
1264	MSMEG_1333	conserved hypothetical protein	1.7853	0.471241
1265	MSMEG_1334	metallo-beta-lactamase family protein	1.73184	0.275697
1266	MSMEG_1335	transcriptional regulator, BadM/Rrf2 family protein	1.1748	0.611754
1267	MSMEG_1336	flavohemoprotein, putative	1.22222	0.631608
1268	MSMEG_1339	ribosomal protein L33	2.11681	0.0969263
1269	MSMEG_1340	conserved hypothetical protein	2.56429	0.109973
1270	MSMEG_1341	MaoC family protein	4.28384	0.198792
1271	MSMEG_1342	conserved hypothetical protein	2.2284	0.166586
1272	MSMEG_1344	translocase	1.04317	0.858051
1273	MSMEG_1345	transcription antitermination protein NusG	1.272	0.346203
1274	MSMEG_1346	ribosomal protein L11	2.17412	0.0602175
1275	MSMEG_1347	ribosomal protein L1	1.68185	0.119981
1276	MSMEG_1348	RNA polymerase ECF-subfamily protein sigma factor	0.843673	0.0219978
1277	MSMEG_1349	dgpf domain family protein	1.11725	0.563173
1278	MSMEG_1350	cyclopropane-fatty-acyl-phospholipid synthase 1	1.42009	0.254823
1279	MSMEG_1351	cyclopropane-fatty-acyl-phospholipid synthase 1	3.61843	0.20506
1280	MSMEG_1352	hydrolase, alpha/beta fold family protein	1.07539	0.717531
1281	MSMEG_1353	ABC1 family protein	1.03531	0.582266
1282	MSMEG_1354	conserved hypothetical protein; this gene contains a frame shift which is not the result of sequencing error	1.32288	0.284057
1283	MSMEG_1355	transcriptional regulator, TetR family protein	1.46238	0.269233
1284	MSMEG_1356	conserved hypothetical protein	0.831572	0.0824025
1285	MSMEG_1357	conserved hypothetical protein	1.16029	0.546414
1286	MSMEG_1358	conserved hypothetical protein	0.942784	0.838082
1287	MSMEG_1359	DeoR-family protein transcriptional regulator	0.919035	0.800334
1288	MSMEG_1360	endonuclease/exonuclease/phosphatase	0.943516	0.632626
1289	MSMEG_1361	alpha-mannosidase	0.750604	0.22139
1290	MSMEG_1362	conserved hypothetical protein	0.94641	0.815284
1291	MSMEG_1363	glucokinase	1.54088	0.354943
1292	MSMEG_1364	50S ribosomal protein L10	4.7005	0.109789
1293	MSMEG_1365	ribosomal protein L7/L12	5.33041	0.0914238
1294	MSMEG_1366	ABC transporter, ATP-binding protein	4.28146	0.0555819
1295	MSMEG_1367	DNA-directed RNA polymerase, beta subunit	1.54847	0.106273
1296	MSMEG_1368	DNA-directed RNA polymerase, beta' subunit	1.95188	0.339633
1297	MSMEG_1369	LacI-family protein transcriptional regulator	1.37488	0.464056
1298	MSMEG_1370	2-deoxy-scyllo-inosamine dehydrogenase	1.46966	0.504156
1299	MSMEG_1371	conserved hypothetical protein	1.19471	0.300581
1300	MSMEG_1372	ABC transporter ATP-binding protein	1.25467	0.180739
1301	MSMEG_1373	ribose/xylose/arabinose/galactoside ABC-type transport systems, permease components	1.62478	0.105053
1302	MSMEG_1374	ribose ABC transporter, periplasmic binding protein	1.44292	0.153166
1303	MSMEG_1375	tagatose-1,6-bisphosphate aldolase GatY	0.922333	0.389164
1304	MSMEG_1376	putative xylulose kinase	1.5321	0.38779
1305	MSMEG_1377	DeoR-family protein transcriptional regulator	1.24276	0.521413
1306	MSMEG_1378	1-phosphofructokinase	1.4386	0.0917495
1307	MSMEG_1379	conserved hypothetical protein	1.47041	0.414233
1308	MSMEG_1380	transcriptional regulator	0.656913	0.124171
1309	MSMEG_1381	MmpS5 protein	1.31108	0.285394
1310	MSMEG_1382	MmpL5 protein	1.31568	0.410366
1311	MSMEG_1383	endonuclease IV	0.743491	0.0226866
1312	MSMEG_1384	conserved hypothetical protein	1.11886	0.701451
1313	MSMEG_1385	PAP2 superfamily protein	1.29116	0.121709
1314	MSMEG_1386	hypothetical protein	0.940198	0.863501
1315	MSMEG_1387	putative acyl-CoA dehydrogenase	0.523502	0.0845848
1316	MSMEG_1388	enoyl-CoA hydratase	0.601876	0.0938991
1317	MSMEG_1389	conserved hypothetical protein	0.839131	0.461429
1318	MSMEG_1390	enoyl-CoA hydratase	0.673449	0.062605
1319	MSMEG_1391	transcriptional regulator, LysR family protein	1.59397	0.170605
1320	MSMEG_1392	alcohol dehydrogenase, class IV	1.31647	0.37947
1321	MSMEG_1393	conserved hypothetical protein	1.68137	0.136143
1323	MSMEG_1395	lipoprotein, putative	1.08259	0.278917
1324	MSMEG_1396	LprB protein	1.13345	0.138179
1325	MSMEG_1397	transcriptional regulator, TetR family protein	1.92145	0.13343
1326	MSMEG_1398	ribosomal protein S12	3.63911	0.0504991
1327	MSMEG_1399	ribosomal protein S7	3.90431	0.0834795
1328	MSMEG_1400	elongation factor G; this gene contains a frame shift which is not the result of sequencing error; identified by match to protein family HMM PF00009; match to protein family HMM TIGR00231	2.99761	0.072396
1329	MSMEG_1400	elongation factor G; this gene contains a frame shift which is not the result of sequencing error; identified by match to protein family HMM PF00009; match to protein family HMM TIGR00231	4.4541	0.10089
1330	MSMEG_1401	translation elongation factor Tu	2.38985	0.329991
1331	MSMEG_1402	hypothetical protein	1.48578	0.152651
1332	MSMEG_1403	cutinase superfamily protein	0.864553	0.427656
1333	MSMEG_1406	conserved hypothetical protein	1.1721	0.54282
1334	MSMEG_1407	Na(+)/H(+) antiporter; this gene contains a frame shift which is not the result of sequencing error	0.857016	0.196225
1335	MSMEG_1407	Na(+)/H(+) antiporter; this gene contains a frame shift which is not the result of sequencing error	1.36963	0.11728
1336	MSMEG_1408	arginine/ornithine antiporter; this region contains one or more premature stops and/or frameshifts which are not the result of sequencing error	0.917056	0.546376
1337	MSMEG_1408	arginine/ornithine antiporter; this region contains one or more premature stops and/or frameshifts which are not the result of sequencing error	0.92087	0.208354
1338	MSMEG_1408	arginine/ornithine antiporter; this region contains one or more premature stops and/or frameshifts which are not the result of sequencing error	1.29134	0.352451
1339	MSMEG_1409	arginine deiminase	1.2849	0.359419
1340	MSMEG_1410	carveol dehydrogenase	1.13705	0.594796
1341	MSMEG_1411	universal stress protein family protein	1.19581	0.687353
1342	MSMEG_1412	amino acid permease	1.14361	0.752551
1343	MSMEG_1413	ornithine--oxo-acid transaminase	1.29603	0.634587
1344	MSMEG_1414	Amidinotransferase	1.47243	0.329198
1345	MSMEG_1415	AsnC-family protein transcriptional regulator	1.23505	0.533738
1346	MSMEG_1416	Pyridine nucleotide-disulphide oxidoreductase	2.25797	0.276834
1347	MSMEG_1417	glyoxalase family protein	1.18902	0.656487
1348	MSMEG_1418	RNA polymerase ECF-type sigma factor	1.09102	0.743786
1349	MSMEG_1419	conserved hypothetical protein	1.53036	0.0590369
1350	MSMEG_1420	probable transcriptional regulatory protein	1.56388	0.0286484
1351	MSMEG_1421	hypothetical protein	0.895826	0.366286
1352	MSMEG_1422	conserved hypothetical protein	1.16384	0.414468
1353	MSMEG_1423	radical SAM domain protein	0.997517	0.983811
1354	MSMEG_1424	FMN-dependent dehydrogenase	0.938959	0.701745
1355	MSMEG_1425	creatininase subfamily protein	0.795673	0.348853
1356	MSMEG_1426	probable membrane sugar transferase	1.04164	0.873792
1357	MSMEG_1427	transmembrane efflux protein	1.45249	0.439993
1358	MSMEG_1428	glucose-methanol-choline oxidoreductase	1.60999	0.464041
1359	MSMEG_1429	cytochrome P450-terp	1.31094	0.300668
1360	MSMEG_1430	transcriptional regulator, TetR family protein	1.02195	0.874784
1361	MSMEG_1431	cytochrome P450-terp	1.3044	0.352621
1362	MSMEG_1432	acetylcholinesterase	2.42361	0.150114
1363	MSMEG_1433	thioesterase	1.27136	0.453375
1364	MSMEG_1434	conserved hypothetical protein	1.84605	0.22089
1365	MSMEG_1435	ribosomal protein S10	3.29192	0.0820143
1366	MSMEG_1436	ribosomal protein L3	4.68454	0.0656182
1367	MSMEG_1437	ribosomal protein L4/L1 family protein	3.92667	0.0696246
1368	MSMEG_1438	ribosomal protein L23	4.97476	0.0881457
1369	MSMEG_1439	ribosomal protein L2	3.9317	0.107149
1370	MSMEG_1440	ribosomal protein S19	4.54076	0.109501
1371	MSMEG_1441	50S ribosomal protein L22	2.7676	0.0808728
1373	MSMEG_1443	ribosomal protein L16	3.88951	0.0569194
1374	MSMEG_1444	ribosomal protein L29	3.45109	0.163361
1375	MSMEG_1445	30S ribosomal protein S17	4.37465	0.2115
1376	MSMEG_1446	NTP pyrophosphohydrolase	1.55505	0.101881
1377	MSMEG_1447	transcriptional regulator, MerR family protein	1.22514	0.489824
1378	MSMEG_1448	integral membrane transporter	1.09036	0.558446
1379	MSMEG_1449	fasciclin domain protein; this gene contains a frame shift which is not the result of sequencing error; identified by match to protein family HMM PF02469	1.24076	0.355278
1380	MSMEG_1450	hypothetical protein	1.32957	0.0308199
1381	MSMEG_1451	arylsulfatase	1.25743	0.0797003
1382	MSMEG_1452	sulfatase-modifying factor 1	4.172	0.367359
1383	MSMEG_1453	Citrate transporter	1.33416	0.49821
1384	MSMEG_1454	hypothetical protein	1.19473	0.142287
1385	MSMEG_1455	putative multidrug resistance protein	1.25675	0.303419
1386	MSMEG_1456	hypothetical protein	0.985163	0.943229
1387	MSMEG_1457	conserved hypothetical protein	1.37298	0.379871
1388	MSMEG_1458	tena/thi-4 family protein	1.25054	0.179029
1389	MSMEG_1459	Rieske [2Fe-2S] domain protein	1.29192	0.332275
1390	MSMEG_1460	Pyridine nucleotide-disulphide oxidoreductase	2.38919	0.0906435
1391	MSMEG_1461	5-oxovalerate dehydrogenase	1.79056	0.0839351
1392	MSMEG_1462	ferredoxin	1.29404	0.235236
1393	MSMEG_1463	gamma-glutamyltranspeptidase	1.15842	0.410921
1394	MSMEG_1464	translation initiation inhibitor	1.4397	0.0372135
1395	MSMEG_1465	ribosomal protein L14	2.35765	0.127788
1396	MSMEG_1466	ribosomal protein L24	2.88792	0.106237
1397	MSMEG_1467	50S ribosomal protein L5	3.55568	0.0660783
1398	MSMEG_1468	ribosomal protein S14p/S29e	3.82562	0.0690993
1399	MSMEG_1469	ribosomal protein S8	3.70821	0.128018
1400	MSMEG_1470	50S ribosomal protein L6	2.96634	0.156291
1401	MSMEG_1471	ribosomal protein L18	2.50083	0.0859509
1402	MSMEG_1472	ribosomal protein S5	2.8538	0.0704699
1403	MSMEG_1473	ribosomal protein L30	3.68988	0.0823293
1404	MSMEG_1474	ribosomal protein L15	2.6601	0.247633
1406	MSMEG_1476	signal peptide peptidase SppA, 67K type	0.52033	0.0470166
1407	MSMEG_1477	major facilitator superfamily protein	0.63763	0.031509
1408	MSMEG_1478	transporter, LysE family protein	0.544893	0.0983526
1411	MSMEG_1481	methyltransferase	0.425365	0.0746745
1412	MSMEG_1482	methyltransferase	0.49098	0.0865755
1413	MSMEG_1483	preprotein translocase, SecY subunit	1.45704	0.0632937
1414	MSMEG_1484	adenylate kinase	1.46807	0.324822
1415	MSMEG_1485	methionine aminopeptidase, type I	1.61507	0.212764
1416	MSMEG_1486	RNA polymerase sigma-70 factor	0.699266	0.180353
1417	MSMEG_1487	conserved hypothetical protein	0.899377	0.827074
1419	MSMEG_1489	conserved hypothetical protein	0.275819	0.06802
1423	MSMEG_1493	sensor histidine kinase	0.860847	0.382556
1424	MSMEG_1493	sensor histidine kinase	0.967723	0.829587
1425	MSMEG_1494	transcriptional regulatory protein DegU	0.846258	0.501496
1426	MSMEG_1495	HAD-superfamily protein hydrolase subfamily protein IA, variant 3, putative	1.3939	0.390791
1427	MSMEG_1496	3-hydroxyisobutyrate dehydrogenase	1.05423	0.849361
1428	MSMEG_1497	acyl-CoA dehydrogenase family protein member 8	1.32218	0.514608
1429	MSMEG_1498	methylmalonate-semialdehyde dehydrogenase	1.28564	0.651882
1430	MSMEG_1499	oxygenase	2.0317	0.374301
1431	MSMEG_1500	TetR family protein transcriptional regulatory protein	1.14623	0.304144
1432	MSMEG_1501	methyltransferase, putative, family protein	0.975307	0.726934
1433	MSMEG_1502	ABC transporter, ATP-binding protein	0.921683	0.751996
1434	MSMEG_1503	probable antibiotic-transport integral membrane leucine and valine rich protein abc transporter	1.20221	0.161209
1435	MSMEG_1504	probable antibiotic-transport integral membrane leucine and alanine and valine rich protein abc transporter	1.05241	0.791314
1436	MSMEG_1505	integral membrane protein	1.03225	0.808629
1437	MSMEG_1506	transcriptional regulator, TetR family protein	0.824813	0.189702
1438	MSMEG_1507	D-aminopeptidase	1.54455	0.357507
1439	MSMEG_1508	amino acid permease-associated region	0.994083	0.977995
1440	MSMEG_1509	TetR-family protein transcriptional regulator	1.26796	0.526544
1441	MSMEG_1510	dTDP-4-dehydrorhamnose 3,5-epimerase	1.25783	0.224982
1442	MSMEG_1511	putative oxidoreductase	1.03382	0.905869
1443	MSMEG_1512	dTDP-glucose 4,6-dehydratase	1.19453	0.0756936
1444	MSMEG_1513	conserved hypothetical protein	0.880177	0.592277
1445	MSMEG_1514	conserved hypothetical protein	0.687916	0.156906
1446	MSMEG_1515	two-component sensor histidine kinase	0.89185	0.244647
1447	MSMEG_1516	thioredoxin reductase	0.929773	0.69263
1448	MSMEG_1517	spfh domain/band 7 family protein, putative	1.3629	0.374379
1449	MSMEG_1518	hypothetical protein	1.1627	0.495634
1450	MSMEG_1519	translation initiation factor IF-1	2.5125	0.0713074
1451	MSMEG_1520	ribosomal protein L36	3.88077	0.0947974
1452	MSMEG_1521	ribosomal protein S13p/S18e	4.43917	0.0905046
1453	MSMEG_1522	ribosomal protein S11	2.39834	0.0783315
1454	MSMEG_1523	ribosomal protein S4	3.53444	0.0809214
1455	MSMEG_1524	DNA-directed RNA polymerase, alpha subunit	2.32702	0.151822
1456	MSMEG_1525	50S ribosomal protein L17	2.55023	0.139716
1457	MSMEG_1526	probable cutinase	1.05005	0.83972
1458	MSMEG_1527	tRNA pseudouridine synthase A	1.04997	0.715496
1459	MSMEG_1528	cutinase	1.23872	0.252447
1460	MSMEG_1529	serine esterase, cutinase family protein	1.2367	0.182893
1461	MSMEG_1530	integral membrane protein	0.94916	0.678309
1462	MSMEG_1531	conserved hypothetical protein	1.0247	0.862871
1463	MSMEG_1532	antibiotic biosynthesis monooxygenase	0.35288	0.0916016
1464	MSMEG_1533	subtilase family protein	1.29498	0.461954
1465	MSMEG_1534	probable conserved membrane protein	1.03732	0.894969
1466	MSMEG_1535	conserved hypothetical protein	2.20614	0.263979
1467	MSMEG_1536	ftsk/spoiiie family protein	0.849899	0.408479
1468	MSMEG_1537	conserved hypothetical protein	1.02053	0.877293
1469	MSMEG_1538	conserved hypothetical protein	0.948337	0.757101
1470	MSMEG_1539	conserved hypothetical protein	1.12034	0.820704
1471	MSMEG_1540	ATP-dependent RNA helicase	1.95744	0.20176
1472	MSMEG_1541	hypothetical protein	1.60779	0.294677
1473	MSMEG_1542	transcriptional regulator	1.04612	0.760319
1474	MSMEG_1543	eptc-inducible aldehyde dehydrogenase	2.28723	0.275326
1475	MSMEG_1544	PduO protein	2.33266	0.244385
1476	MSMEG_1545	conserved hypothetical protein	1.54157	0.284428
1477	MSMEG_1546	coenzyme B12-dependent glycerol dehydrogenase small subunit	1.65198	0.22855
1478	MSMEG_1547	glycerol dehydratase large subunit	1.38847	0.458547
1479	MSMEG_1548	propanediol utilization: dehydratase, medium subunit	1.47869	0.328966
1480	MSMEG_1549	glycerol dehydratase reactivation factor large subunit; this gene contains a frame shift which is not the result of sequencing error	1.77604	0.230666
1481	MSMEG_1550	PduH protein	1.05989	0.907688
1482	MSMEG_1551	hypothetical protein	1.33507	0.329078
1483	MSMEG_1552	ethanolamine permease	0.843266	0.510489
1484	MSMEG_1553	ethanolamine ammonia-lyase, large subunit	2.09466	0.46732
1485	MSMEG_1554	ethanolamine ammonia-lyase, light chain	1.23687	0.654362
1486	MSMEG_1555	conserved hypothetical protein, authentic frameshift; this gene contains a frame shift which is not the result of sequencing error; identified by similarity to RF:NP_854757.1	1.10865	0.71707
1487	MSMEG_1556	ribosomal protein L13	4.03292	0.0994081
1488	MSMEG_1557	ribosomal protein S9	3.29571	0.110127
1489	MSMEG_1558	conserved hypothetical protein	1.01712	0.831213
1490	MSMEG_1559	phosphoglucosamine mutase	1.68164	0.0557793
1491	MSMEG_1560	conserved hypothetical protein	1.12031	0.730186
1492	MSMEG_1561	LysR-family protein trancsriptional regulator	0.778315	0.236339
1493	MSMEG_1562	conserved hypothetical alanine and proline rich protein; this gene contains a frame shift which is not the result of sequencing error	1.4558	0.061837
1494	MSMEG_1562	conserved hypothetical alanine and proline rich protein; this gene contains a frame shift which is not the result of sequencing error	1.51724	0.440474
1495	MSMEG_1563	short-chain dehydrogenase/reductase SDR	1.39186	0.395058
1496	MSMEG_1564	lignostilbene-alpha,beta-dioxygenase	1.28911	0.305912
1497	MSMEG_1565	transcriptional regulator, TetR family protein	0.827928	0.520817
1498	MSMEG_1566	oxidoreductase	1.38991	0.487934
1499	MSMEG_1567	conserved hypothetical protein	1.71542	0.197816
1500	MSMEG_1568	glucosamine--fructose-6-phosphate aminotransferase, isomerizing	0.974724	0.86371
1501	MSMEG_1569	hypothetical protein	1.19592	0.517956
1502	MSMEG_1570	carboxylesterase	1.14952	0.792401
1503	MSMEG_1571	integral membrane protein	1.31435	0.471833
1504	MSMEG_1572	transcriptional regulator, GntR family protein	1.15453	0.492758
1505	MSMEG_1573	carbohydrate kinase family protein	1.23865	0.355148
1506	MSMEG_1574	glutamate decarboxylase	1.45925	0.509595
1507	MSMEG_1575	alanine racemase	1.02726	0.792084
1508	MSMEG_1576	alpha/beta hydrolase fold	2.18834	0.357049
1509	MSMEG_1577	conserved hypothetical protein	1.12454	0.000237556
1510	MSMEG_1578	peptidase M22, glycoprotease	1.07996	0.675673
1511	MSMEG_1579	ribosomal-protein-alanine acetyltransferase	1.16129	0.184277
1512	MSMEG_1580	O-sialoglycoprotein endopeptidase	1.10336	0.160476
1513	MSMEG_1581	conserved hypothetical protein	1.48405	0.113017
1514	MSMEG_1582	chaperonin GroS	2.29783	0.172815
1515	MSMEG_1583	chaperonin GroL	3.96373	0.169772
1516	MSMEG_1584	hypothetical protein	1.70528	0.183008
1517	MSMEG_1585	cupin domain protein	1.32902	0.384595
1518	MSMEG_1586	beta-lactamase	1.10382	0.772314
1519	MSMEG_1587	alpha/beta hydrolase fold	1.23708	0.477551
1520	MSMEG_1588	conserved hypothetical protein	0.614821	0.0236749
1521	MSMEG_1589	hypothetical protein	0.931873	0.806879
1522	MSMEG_1590	hypothetical protein	1.23465	0.492627
1523	MSMEG_1591	TnpC protein	0.921045	0.826067
1524	MSMEG_1591	TnpC protein	1.57728	0.0563476
1525	MSMEG_1592	hypothetical protein	1.22694	0.433837
1526	MSMEG_1593	hypothetical protein	1.52625	0.488688
1527	MSMEG_1594	enoyl-CoA hydratase	1.09855	0.0436482
1528	MSMEG_1595	putative oxidoreductase	0.979265	0.948215
1529	MSMEG_1596	transcriptional regulator	1.4069	0.293526
1530	MSMEG_1597	Transcription factor WhiB	1.23977	0.584434
1531	MSMEG_1598	conserved hypothetical protein	1.52971	0.396093
1532	MSMEG_1599	RNA polymerase sigma-70 factor	0.794866	0.342044
1533	MSMEG_1600	conserved hypothetical protein	0.867573	0.338296
1534	MSMEG_1601	conserved hypothetical protein	1.06581	0.696033
1535	MSMEG_1602	inosine-5'-monophosphate dehydrogenase	0.718387	0.0911506
1536	MSMEG_1603	IMP dehydrogenase family protein	1.10911	0.273987
1537	MSMEG_1604	FAD dependent oxidoreductase	1.54263	0.313403
1538	MSMEG_1605	phosphate transport system regulatory protein PhoU	1.28236	0.576397
1539	MSMEG_1606	benzoylformate decarboxylase	1.09104	0.904719
1540	MSMEG_1607	putative tautomerase	0.92887	0.807087
1541	MSMEG_1608	glycosyl transferase	0.821029	0.110667
1542	MSMEG_1609	beta-phosphoglucomutase hydrolase; this gene contains a frame shift which is not the result of sequencing error; identified by match to protein family HMM PF00702; match to protein family HMM TIGR01509; match to protein family HMM TIGR02009	3.15429	0.363289
1543	MSMEG_1610	glutamine-hydrolyzing GMP synthase	0.847976	0.201362
1544	MSMEG_1611	transcriptional regulator, TetR family protein, putative	0.860988	0.174602
1545	MSMEG_1612	extracellular solute-binding protein, family protein 3	1.29903	0.518993
1546	MSMEG_1613	ABC polar amino acid transporter, inner membrane subunit	1.4374	0.232726
1547	MSMEG_1614	glutamine transport ATP-binding protein GlnQ	1.15366	0.467025
1548	MSMEG_1615	gamma-glutamyltranspeptidase	1.09993	0.702071
1549	MSMEG_1616	hypothetical protein; this gene contains a frame shift which is not the result of sequencing error; identified by Glimmer2; putative	1.16709	0.581968
1550	MSMEG_1617	kumamolisin	1.73444	0.10176
1551	MSMEG_1618	hypothetical protein	2.07627	0.115841
1552	MSMEG_1619	hypothetical protein	1.60818	0.147971
1553	MSMEG_1620	conserved hypothetical protein	1.13742	0.705106
1554	MSMEG_1621	pyrimidine-specific ribonucleoside hydrolase RihA	1.50621	0.247105
1555	MSMEG_1622	putative DNA repair polymerase	1.16391	0.546691
1556	MSMEG_1623	short chain dehydrogenase	0.91296	0.51982
1557	MSMEG_1624	universal stress protein family protein	1.43622	0.137505
1558	MSMEG_1625	amino acid transporter, putative	1.23205	0.682395
1559	MSMEG_1626	putative DNA-binding protein	0.763001	0.244358
1560	MSMEG_1627	hypothetical protein	1.08691	0.746745
1561	MSMEG_1628	oxidoreductase, short chain dehydrogenase/reductase family protein	1.71047	0.221533
1562	MSMEG_1629	hypothetical protein	3.26588	0.134067
1563	MSMEG_1630	2,5-dichloro-2,5-cyclohexadiene-1,4-diol dehydrogenase	1.28879	0.422543
1564	MSMEG_1631	DNA-binding protein	0.837772	0.508004
1565	MSMEG_1632	hypothetical protein	0.906238	0.59062
1566	MSMEG_1633	DNA polymerase III, alpha subunit, putative	1.24137	0.284058
1567	MSMEG_1634	probable forkhead-associated protein	1.97283	0.318521
1568	MSMEG_1635	nitroreductase family protein	0.671872	0.178488
1569	MSMEG_1636	RNA methyltransferase, TrmH family protein, group 2	1.03428	0.815019
1570	MSMEG_1637	periplasmic sensor signal transduction histidine kinase	1.55742	0.0978099
1571	MSMEG_1638	Roadblock/LC7 domain protein	1.52405	0.0801005
1572	MSMEG_1639	conserved hypothetical protein	1.53631	0.257039
1573	MSMEG_1640	ATP/GTP-binding protein	1.55952	0.160066
1574	MSMEG_1641	conserved hypothetical protein	1.89807	0.278363
1575	MSMEG_1642	ABC transporter, ATP-binding protein	1.0031	0.980596
1576	MSMEG_1643	hypothetical protein	1.83631	0.305013
1577	MSMEG_1644	hypothetical protein	0.835383	0.582902
1578	MSMEG_1645	NADH:flavin oxidoreductase/nadh oxidase	1.43994	0.24976
1579	MSMEG_1646	ribosomal RNA adenine dimethylase family protein	1.09205	0.559871
1580	MSMEG_1647	tetrahydrofolate dehydrogenase/cyclohydrolase FolD	0.943014	0.702263
1581	MSMEG_1648	putative transcriptional regulator	1.04225	0.817997
1582	MSMEG_1649	FAD dependent oxidoreductase	0.571556	0.133595
1583	MSMEG_1650	methyltransferase type 11	1.95226	0.0462405
1588	MSMEG_1655	hydrolase, alpha/beta fold family protein, putative	1.44448	0.252281
1589	MSMEG_1656	exodeoxyribonuclease III	4.0681	0.233447
1590	MSMEG_1657	tryptophanyl-tRNA synthetase	2.41183	0.297635
1591	MSMEG_1658	ribonuclease, putative	1.51008	0.116189
1592	MSMEG_1659	multidrug resistance protein, SMR family protein	2.34172	0.19236
1593	MSMEG_1660	oxidoreductase, 2-nitropropane dioxygenase family protein	1.25984	0.369341
1594	MSMEG_1661	D-alanyl-D-alanine carboxypeptidase	1.46588	0.264362
1595	MSMEG_1662	taurine-pyruvate aminotransferase	1.44537	0.0162577
1596	MSMEG_1663	transcriptional regulator, AsnC family protein	1.14152	0.303654
1597	MSMEG_1664	hypothetical protein	1.93208	0.273559
1598	MSMEG_1665	aldehyde dehydrogenase (NAD) family protein	1.91998	0.347009
1599	MSMEG_1666	RNA polymerase sigma-70 factor	0.699174	0.143826
1600	MSMEG_1667	IS110 family transposase, truncation; identified by similarity to OMNI:MT3430	0.657439	0.162687
1601	MSMEG_1668	pyridoxamine 5'-phosphate oxidase family protein	1.14096	0.544707
1602	MSMEG_1669	succinate dehydrogenase, iron-sulfur protein	1.60881	0.192491
1603	MSMEG_1670	succinate dehydrogenase, flavoprotein subunit	1.45455	0.263934
1604	MSMEG_1671	succinate dehydrogenase hydrophobic membrane anchor protein SdhD	1.0719	0.352041
1605	MSMEG_1672	succinate dehydrogenase, cytochrome b556 subunit	1.35182	0.300851
1606	MSMEG_1673	cytidine deaminase	1.50677	0.286803
1607	MSMEG_1674	hypothetical protein	0.897937	0.754634
1608	MSMEG_1675	pyrimidine-nucleoside phosphorylase	1.319	0.551647
1609	MSMEG_1676	adenosine deaminase	0.653446	0.141134
1610	MSMEG_1677	aspartate ammonia-lyase	2.47209	0.174908
1611	MSMEG_1678	transcriptional regulator, LysR family protein	0.639532	0.0574425
1612	MSMEG_1679	AmiB	2.44377	0.216507
1613	MSMEG_1680	conserved hypothetical protein	3.88098	0.231668
1614	MSMEG_1681	endoribonuclease L-PSP superfamily protein	3.42591	0.23784
1615	MSMEG_1682	flavin-containing monooxygenase FMO	2.07972	0.170778
1616	MSMEG_1683	cytosine/purine/uracil/thiamine/allantoin permease family protein	3.39924	0.305097
1617	MSMEG_1684	conserved hypothetical protein	1.49532	0.37193
1618	MSMEG_1685	hypothetical protein	1.0621	0.90672
1619	MSMEG_1686	NPL/P60-family protein secreted protein	1.74934	0.38948
1620	MSMEG_1687	hypothetical protein	1.26783	0.509478
1621	MSMEG_1688	cupin domain protein	1.01542	0.962423
1622	MSMEG_1689	3-oxoacyl-[acyl-carrier-protein] reductase	1.16714	0.198515
1623	MSMEG_1690	putative ECF sigma factor RpoE1	1.31823	0.320437
1624	MSMEG_1691	transcriptional regulatory protein	1.51021	0.181021
1625	MSMEG_1692	ECF-family protein RNA polymerase sigma factor	0.938118	0.53707
1626	MSMEG_1693	succinate dehydrogenase [ubiquinone] flavoprotein subunit	1.11134	0.407489
1627	MSMEG_1694	uracil phosphoribosyltransferase	0.971822	0.757903
1628	MSMEG_1695	phosphoglucomutase/phosphomannomutase	0.684895	0.173406
1629	MSMEG_1696	regulatory protein, MarR	1.09758	0.72566
1630	MSMEG_1697	hypothetical protein	1.57143	0.110763
1631	MSMEG_1698	putative ammonia monooxygenase superfamily protein	1.04606	0.701747
1632	MSMEG_1699	pentachlorophenol 4-monooxygenase	0.925761	0.606952
1633	MSMEG_1700	TetR-family protein transcriptional regulator	1.22871	0.502539
1634	MSMEG_1701	purine nucleotide phosphorylase	1.44181	0.461909
1635	MSMEG_1702	amidohydrolase	1.43159	0.0472016
1636	MSMEG_1703	amidohydrolase	1.04667	0.796155
1637	MSMEG_1704	ABC transporter	0.647651	0.206032
1638	MSMEG_1705	D-xylose transport ATP-binding protein XylG	0.663506	0.125175
1639	MSMEG_1706	xylose transport system permease protein XylH	0.621746	0.0464071
1640	MSMEG_1707	phosphatase YfbT	1.29276	0.542651
1641	MSMEG_1708	ribose operon repressor, putative	1.05522	0.783474
1642	MSMEG_1709	inner membrane ABC transporter permease protein YjfF	2.23057	0.112934
1643	MSMEG_1710	ribose transport system permease protein RbsC	1.27547	0.39667
1644	MSMEG_1711	ATP binding protein of ABC transporter	6.62707	0.385917
1645	MSMEG_1712	ABC transporter periplasmic-binding protein YtfQ	1.72527	0.324626
1646	MSMEG_1713	L-ribulokinase	2.22343	0.362112
1647	MSMEG_1714	L-ribulose-5-phosphate 4-epimerase UlaF	1.75345	0.188721
1648	MSMEG_1715	L-arabinose isomerase	1.99167	0.335966
1649	MSMEG_1716	IS3 family protein element, transposase orfA	1.38319	0.520947
1650	MSMEG_1717	ISMsm8, transposase	1.59628	0.31838
1651	MSMEG_1718	This gene is disrupted by an IS element.; IS3 family element, transposase orfB, interruption-N; identified by similarity to GP:15619023	1.17673	0.56692
1652	MSMEG_1719	This gene is disrupted by an IS element.; IS3 family element, transposase orfB, interruption-C; identified by similarity to GP:15619023	0.95039	0.873502
1653	MSMEG_1721	IS1137, transposase orfB	0.989884	0.974254
1654	MSMEG_1722	hypothetical protein	1.89677	0.268761
1655	MSMEG_1723	hypothetical protein	1.03256	0.842302
1656	MSMEG_1724	conserved hypothetical protein	1.09633	0.480421
1657	MSMEG_1729	This gene is disrupted by an ISMsm1 element.; ISMsm5, transposase, interruption-N; identified by similarity to GB:CAD18826.1	0.927513	0.637927
1658	MSMEG_1731	IS6120, transposase	1.19936	0.404728
1659	MSMEG_1731	IS6120, transposase	1.26236	0.653015
1660	MSMEG_1731	IS6120, transposase	3.12329	0.147253
1661	MSMEG_1732	Transposase IS116/IS110/IS902 family protein	1.46002	0.340492
1662	MSMEG_1733	conserved hypothetical protein	1.30035	0.351727
1663	MSMEG_1734	conserved hypothetical protein	2.06273	0.303988
1664	MSMEG_1735	dihydrolipoamide dehydrogenase	2.28521	0.323387
1665	MSMEG_1736	glycerol-3-phosphate dehydrogenase 2	0.904943	0.608362
1666	MSMEG_1737	RNA pseudouridine synthase family protein	1.04231	0.853395
1667	MSMEG_1738	probable conserved transmembrane protein	0.715346	0.193565
1668	MSMEG_1739	enoyl-CoA hydratase/isomerase family protein	1.64784	0.0603237
1669	MSMEG_1740	dehydrogenase/reductase SDR family protein member 4	2.62098	0.0660231
1670	MSMEG_1741	TetR-family protein transcriptional regulator	1.81643	0.0331381
1671	MSMEG_1742	oxidoreductase	1.66914	0.284569
1672	MSMEG_1743	Fatty acid desaturase	1.28204	0.257113
1673	MSMEG_1744	hypothetical protein	0.992632	0.968858
1674	MSMEG_1745	transcriptional regulator	0.89147	0.539363
1675	MSMEG_1746	6-hydroxy-D-nicotine oxidase	1.05742	0.825556
1676	MSMEG_1747	RNA polymerase sigma-70 factor	0.813117	0.387648
1677	MSMEG_1749	putative monooxygenase	0.65272	0.0501583
1678	MSMEG_1750	hypothetical protein	1.47651	0.618305
1679	MSMEG_1750	hypothetical protein	1.79825	0.408784
1680	MSMEG_1751	norsolorinic acid reductase	0.569716	0.206824
1681	MSMEG_1752	hypothetical protein	1.40471	0.637373
1682	MSMEG_1753	MTA/SAH nucleosidase	0.775845	0.333857
1683	MSMEG_1754	conserved hypothetical protein	0.565343	0.136131
1684	MSMEG_1755	anti-sigm factor, ChrR	1.33248	0.268073
1685	MSMEG_1756	endonuclease VIII and dna n-glycosylase with an ap lyase activity	1.25992	0.600291
1686	MSMEG_1757	DEAD/DEAH box helicase	0.954744	0.894198
1687	MSMEG_1758	hypothetical protein	0.855297	0.426667
1688	MSMEG_1759	hypothetical protein	0.890303	0.590033
1689	MSMEG_1760	short-chain dehydrogenase/reductase SDR	0.787362	0.566369
1690	MSMEG_1761	integral membrane protein	1.03082	0.938932
1691	MSMEG_1762	piperideine-6-carboxylic acid dehydrogenase	0.698798	0.209846
1692	MSMEG_1763	leucine-responsive regulatory protein	1.36233	0.174324
1693	MSMEG_1764	L-lysine-epsilon aminotransferase	1.47025	0.566488
1694	MSMEG_1765	restriction endonuclease family protein	1.14318	0.332082
1695	MSMEG_1766	conserved hypothetical protein	0.945283	0.794986
1696	MSMEG_1767	conserved hypothetical protein	0.824202	0.399354
1697	MSMEG_1768	conserved hypothetical protein	1.00522	0.97938
1698	MSMEG_1769	UsfY protein	0.938911	0.6723
1699	MSMEG_1770	conserved hypothetical protein	0.711486	0.301777
1700	MSMEG_1771	methylase, putative	1.13563	0.726861
1701	MSMEG_1772	conserved hypothetical protein	0.990582	0.970263
1702	MSMEG_1773	conserved hypothetical protein	0.578641	0.103741
1703	MSMEG_1774	conserved hypothetical protein	0.879819	0.722962
1704	MSMEG_1775	cytochrome P450 monooxygenase	0.870249	0.634588
1705	MSMEG_1776	ribonuclease Z	0.692269	0.183071
1706	MSMEG_1777	UsfY protein	0.821651	0.479086
1707	MSMEG_1778	conserved hypothetical protein	1.27859	0.459155
1708	MSMEG_1779	hypothetical protein	0.758822	0.0635988
1709	MSMEG_1780	hypothetical protein	0.859612	0.391591
1710	MSMEG_1781	hypothetical protein	0.882818	0.13736
1711	MSMEG_1782	oxidoreductase, short chain dehydrogenase/reductase family protein	1.19683	0.707708
1712	MSMEG_1783	hypothetical protein	0.90669	0.623618
1713	MSMEG_1784	type I topoisomerase	1.23917	0.631166
1714	MSMEG_1785	hypothetical protein	0.785647	0.0399132
1715	MSMEG_1786	stas domain, putative	1.03587	0.913796
1716	MSMEG_1787	RsbW protein	0.776267	0.461964
1717	MSMEG_1788	conserved hypothetical protein	0.943007	0.889841
1718	MSMEG_1789	conserved hypothetical protein	1.01766	0.963147
1719	MSMEG_1790	conserved hypothetical protein	0.806286	0.416866
1720	MSMEG_1791	UsfY protein	0.6962	0.203369
1721	MSMEG_1792	conserved hypothetical protein	0.820766	0.481928
1722	MSMEG_1793	membrane protein	0.761791	0.010423
1723	MSMEG_1794	dehydrogenase	0.738161	0.366519
1724	MSMEG_1795	2-deoxy-scyllo-inosamine dehydrogenase	1.00173	0.992233
1725	MSMEG_1796	membrane protein	1.02762	0.958286
1726	MSMEG_1797	salicylate esterase	1.2781	0.218654
1727	MSMEG_1798	major facilitator superfamily protein	1.29962	0.587091
1728	MSMEG_1799	transcriptional regulator	1.07243	0.729977
1729	MSMEG_1800	hypothetical protein	1.00413	0.993624
1730	MSMEG_1801	hypothetical protein	0.988313	0.947517
1731	MSMEG_1802	ChaB protein	0.869127	0.57765
1732	MSMEG_1803	RsbW protein	0.935334	0.824483
1733	MSMEG_1804	RNA polymerase sigma-F factor	1.19223	0.262901
1734	MSMEG_1805	conserved hypothetical protein	3.15457	0.102709
1735	MSMEG_1806	conserved hypothetical protein	1.06441	0.678505
1736	MSMEG_1807	acetyl-/propionyl-coenzyme A carboxylase alpha chain	2.62571	0.121244
1737	MSMEG_1808	Fe-S metabolism associated SufE	0.961251	0.739863
1738	MSMEG_1809	putative thiosulfate sulfurtransferase	0.9482	0.694081
1739	MSMEG_1810	hypothetical protein	2.5029	0.291914
1740	MSMEG_1811	septum formation protein Maf	2.13618	0.208046
1741	MSMEG_1812	conserved hypothetical protein	2.4031	0.155552
1742	MSMEG_1813	propionyl-CoA carboxylase beta chain	3.80681	0.159565
1743	MSMEG_1814	hypothetical protein	1.10561	0.654837
1744	MSMEG_1815	hypothetical protein	1.00458	0.947251
1745	MSMEG_1816	hypothetical protein; this region contains one or more premature stops and/or frameshifts which are not the result of sequencing error; identified by Glimmer2; putative	1.17854	0.404025
1746	MSMEG_1816	hypothetical protein; this region contains one or more premature stops and/or frameshifts which are not the result of sequencing error; identified by Glimmer2; putative	1.61149	0.43729
1747	MSMEG_1817	probable conserved transmembrane protein	1.05744	0.466053
1748	MSMEG_1818	Bacterial membrane flanked domain protein	2.19387	0.517659
1749	MSMEG_1819	phosphoribosylaminoimidazole carboxylase, ATPase subunit	1.46541	0.0202922
1750	MSMEG_1820	phosphoribosylaminoimidazole carboxylase, catalytic subunit	1.31238	0.189586
1751	MSMEG_1821	acyl-CoA dehydrogenase	0.776446	0.0559362
1752	MSMEG_1822	biotin-[acetyl-CoA-carboxylase] ligase	1.53224	0.438379
1753	MSMEG_1823	conserved hypothetical protein	1.21096	0.346161
1754	MSMEG_1824	transcriptional regulator, LytR family protein	1.46148	0.287353
1755	MSMEG_1825	dTDP-4-dehydrorhamnose reductase	1.21167	0.249173
1756	MSMEG_1826	dTDP-RhA:a-D-GlcNAc-diphosphoryl polyprenol, a-3-L-rhamnosyl transferase	1.44009	0.161417
1757	MSMEG_1827	hydrolase, nudix family protein, putative	1.03714	0.412257
1758	MSMEG_1828	Nucleotidyl transferase; this gene contains a frame shift which is not the result of sequencing error; identified by match to protein family HMM PF00132; match to protein family HMM PF00483	1.69559	0.146987
1759	MSMEG_1829	F420-0:gamma-glutamyl ligase	1.67595	0.0302063
1760	MSMEG_1830	lppg:fo 2-phospho-l-lactate transferase	2.26737	0.198881
1761	MSMEG_1831	Transcription factor WhiB	0.741303	0.284017
1762	MSMEG_1832	conserved hypothetical protein	1.24873	0.0283983
1763	MSMEG_1833	conserved hypothetical protein	1.93323	0.185393
1764	MSMEG_1834	phosphomannomutase/phosphoglucomutase	1.27913	0.357058
1765	MSMEG_1835	TobH protein	1.02748	0.789862
1766	MSMEG_1836	mannose-6-phosphate isomerase, class I	1.43127	0.106424
1767	MSMEG_1837	secreted protein	1.38647	0.243857
1768	MSMEG_1838	cationic amino acid transporter	1.3687	0.213506
1769	MSMEG_1839	alkane 1-monooxygenase	1.68582	0.168803
1770	MSMEG_1840	rubredoxin	1.82148	0.351361
1771	MSMEG_1841	rubredoxin	1.11512	0.729088
1772	MSMEG_1842	transcriptional regulator, TetR family protein	1.18009	0.0922783
1773	MSMEG_1843	adenosylhomocysteinase; this gene contains a frame shift which is not the result of sequencing error; identified by match to protein family HMM PF00670; match to protein family HMM PF02254; match to protein family HMM PF02826; match to protein family HMM PF05221; match to protein family HMM TIGR00936	1.44974	0.512718
1774	MSMEG_1843	adenosylhomocysteinase; this gene contains a frame shift which is not the result of sequencing error; identified by match to protein family HMM PF00670; match to protein family HMM PF02254; match to protein family HMM PF02826; match to protein family HMM PF05221; match to protein family HMM TIGR00936	1.9313	0.21099
1775	MSMEG_1844	conserved hypothetical protein	1.41474	0.419459
1776	MSMEG_1845	YghA protein	1.06812	0.815563
1777	MSMEG_1846	polysulphide reductase, NrfD	1.3489	0.061648
1778	MSMEG_1847	4Fe-4S ferredoxin, iron-sulfur binding protein	0.845763	0.069525
1779	MSMEG_1848	formate dehydrogenase-O, major subunit; this gene contains a frame shift which is not the result of sequencing error; identified by match to protein family HMM PF00384; match to protein family HMM PF04879	0.901919	0.521317
1780	MSMEG_1848	formate dehydrogenase-O, major subunit; this gene contains a frame shift which is not the result of sequencing error; identified by match to protein family HMM PF00384; match to protein family HMM PF04879	1.67682	0.377801
1781	MSMEG_1849	selenocysteine-specific translation elongation factor	1.25086	0.165006
1782	MSMEG_1850	L-seryl-tRNA selenium transferase	1.46585	0.533129
1783	MSMEG_1852	selenide, water dikinase	0.696429	0.120178
1784	MSMEG_1853	Na+/H+ antiporter NhaA; this gene contains a frame shift which is not the result of sequencing error; identified by match to protein family HMM PF06965	1.07197	0.198887
1785	MSMEG_1853	Na+/H+ antiporter NhaA; this gene contains a frame shift which is not the result of sequencing error; identified by match to protein family HMM PF06965	1.33061	0.300154
1786	MSMEG_1854	valosin containing protein-1	1.21705	0.446417
1787	MSMEG_1855	tetratricopeptide repeat protein, putative	1.40265	0.269617
1788	MSMEG_1856	hypothetical protein	1.26233	0.142353
1789	MSMEG_1859	hypothetical protein	1.11439	0.721309
1790	MSMEG_1860	hypothetical protein	1.18601	0.562095
1791	MSMEG_1861	hypothetical protein	1.58773	0.15228
1792	MSMEG_1862	transposase	0.888133	0.0747523
1793	MSMEG_1862	transposase	1.03877	0.670808
1794	MSMEG_1863	putative transposase	0.687467	0.0756776
1795	MSMEG_1863	putative transposase	0.975745	0.855733
1796	MSMEG_1864	transposase	2.02401	0.119657
1797	MSMEG_1866	transposase B	1.14738	0.386728
1798	MSMEG_1867	transposase	0.999679	0.998214
1799	MSMEG_1868	hypothetical protein	1.29115	0.449344
1800	MSMEG_1869	hypothetical protein	1.73161	0.10304
1801	MSMEG_1870	conserved hypothetical protein	1.15889	0.305822
1802	MSMEG_1871	conserved hypothetical protein	1.01255	0.970758
1803	MSMEG_1872	conserved hypothetical protein	0.960406	0.897161
1804	MSMEG_1873	thymidylate kinase	1.15285	0.549588
1805	MSMEG_1874	DNA-binding response regulator MtrA	0.829765	0.328871
1806	MSMEG_1875	sensor histidine kinase MtrB	1.13077	0.463992
1807	MSMEG_1876	LpqB protein	0.954193	0.643688
1808	MSMEG_1877	conserved hypothetical protein	1.25626	0.199625
1809	MSMEG_1878	S30AE family protein	0.511119	0.119316
1810	MSMEG_1879	hypothetical protein	1.17028	0.737312
1811	MSMEG_1880	hypothetical alanine arginine proline rich protein	1.14874	0.48584
1812	MSMEG_1881	preprotein translocase, SecA subunit	0.954613	0.602158
1813	MSMEG_1882	acyltransferase, ws/dgat/mgat subfamily protein	1.38791	0.446677
1814	MSMEG_1883	glycine betaine transporter OpuD	0.936235	0.718927
1815	MSMEG_1884	conserved hypothetical protein	1.04265	0.691508
1816	MSMEG_1885	2Fe-2S iron-sulfur cluster binding domain protein	1.64571	0.510602
1817	MSMEG_1886	Fatty acid desaturase	1.0108	0.986761
1818	MSMEG_1887	hypothetical protein	0.626557	0.141599
1819	MSMEG_1888	methyltransferase	0.82063	0.549277
1820	MSMEG_1889	putative ribosome small subunit-dependent GTPase RsgA	0.993103	0.96795
1821	MSMEG_1890	3-phosphoshikimate 1-carboxyvinyltransferase	1.06964	0.675882
1822	MSMEG_1891	conserved hypothetical protein	0.759088	0.0452793
1823	MSMEG_1892	transferase	1.24104	0.548278
1824	MSMEG_1893	UbiE/COQ5 methyltransferase	1.01401	0.867873
1825	MSMEG_1894	short chain dehydrogenase	0.833692	0.350077
1826	MSMEG_1895	HTH-type transcriptional regulator AlsR	1.25974	0.543194
1827	MSMEG_1896	beta-ketothiolase	1.92738	0.316839
1828	MSMEG_1897	3-oxoadipate enol-lactonase	1.35497	0.339089
1829	MSMEG_1898	succinyl-CoA:3-ketoacid-coenzyme A transferase 1, precursor	2.11013	0.446744
1830	MSMEG_1899	succinyl-CoA:3-ketoacid-coenzyme A transferase subunit B	1.14114	0.666181
1831	MSMEG_1900	D-alanyl-D-alanine carboxypeptidase family protein	0.94032	0.669919
1832	MSMEG_1900	D-alanyl-D-alanine carboxypeptidase family protein	1.26519	0.274356
1833	MSMEG_1901	DNA-binding HTH domain containing protein, putative	0.860037	0.764703
1834	MSMEG_1902	transcriptional regulator	1.0932	0.786133
1835	MSMEG_1903	caib/baif family protein	0.58024	0.10153
1836	MSMEG_1904	acyl-CoA dehydrogenase	0.633891	0.237684
1837	MSMEG_1905	acyl-CoA dehydrogenase protein	0.688533	0.349266
1838	MSMEG_1906	toluate 1,2-dioxygenase electron transfer component	1.00164	0.99309
1839	MSMEG_1907	toluate 1,2-dioxygenase beta subunit	1.25145	0.580668
1840	MSMEG_1908	benzoate 1,2-dioxygenase alpha subunit	1.66659	0.371136
1841	MSMEG_1909	putative HTH-type transcriptional regulator YnfL	1.89452	0.521154
1842	MSMEG_1910	muconate cycloisomerase	1.20411	0.662023
1843	MSMEG_1911	catechol 1,2-dioxygenase	1.0399	0.885544
1844	MSMEG_1912	muconolactone delta-isomerase 1	1.14352	0.511347
1845	MSMEG_1913	YbaK/ebsC protein	1.04629	0.790652
1846	MSMEG_1914	RNA polymerase sigma-70 factor, family protein	0.949514	0.819571
1847	MSMEG_1915	anti-sigma factor, family protein	0.808738	0.130472
1848	MSMEG_1916	hypothetical protein	1.29128	0.233262
1849	MSMEG_1917	conserved domain protein	1.92867	0.170579
1850	MSMEG_1918	sensor histidine kinase	0.895463	0.769517
1851	MSMEG_1919	Transcription factor WhiB	1.1677	0.536825
1852	MSMEG_1920	diacylglycerol kinase, catalytic region	1.73869	0.183006
1853	MSMEG_1921	SEC-C motif domain protein	1.39009	0.318317
1854	MSMEG_1922	3-dehydroquinate dehydratase, type II	1.55621	0.162039
1855	MSMEG_1923	membrane protein	1.20191	0.179509
1856	MSMEG_1924	N-acetyltransferase Ats1	0.720568	0.00855694
1857	MSMEG_1925	isochorismate synthase DhbC	1.08642	0.837931
1858	MSMEG_1926	phosphoglycerate mutase family protein	0.819685	0.477968
1859	MSMEG_1927	cobyrinic Acid a,c-diamide synthase	1.14322	0.00796069
1860	MSMEG_1928	regulatory protein	0.955675	0.690083
1861	MSMEG_1929	conserved hypothetical protein	4.05525	0.309839
1862	MSMEG_1930	DEAD/DEAH box helicase	0.97991	0.922613
1863	MSMEG_1931	conserved hypothetical protein	0.536786	0.0255186
1864	MSMEG_1932	MmpS3 protein	1.79431	0.149936
1865	MSMEG_1933	hypothetical protein	0.793694	0.187809
1866	MSMEG_1934	ATP-binding protein	1.88343	0.190066
1867	MSMEG_1935	TetR-family protein transcriptional regulator	1.02394	0.927596
1868	MSMEG_1936	conserved hypothetical protein	0.735984	0.129032
1869	MSMEG_1937	molybdopterin biosynthesis protein MoeB	0.79095	0.170207
1870	MSMEG_1938	conserved hypothetical protein	1.27383	0.217566
1871	MSMEG_1939	6-O-methylguanine DNA methyltransferase, DNA binding domain subfamily protein	0.815682	0.148424
1872	MSMEG_1940	hydrolase, alpha/beta fold family protein	0.792947	0.283577
1873	MSMEG_1941	helicase, UvrD/Rep family protein	1.35451	0.41196
1874	MSMEG_1942	integral membrane protein	1.07316	0.409059
1875	MSMEG_1943	ATP-dependent DNA helicase	1.64005	0.261707
1876	MSMEG_1944	membrane protein	0.724676	0.119578
1877	MSMEG_1945	ion channel membrane protein	1.85062	0.108937
1878	MSMEG_1946	NADH pyrophosphatase	1.17543	0.346532
1879	MSMEG_1947	conserved hypothetical protein	0.751231	0.344884
1880	MSMEG_1948	hypothetical protein	1.18766	0.736538
1881	MSMEG_1949	hypothetical protein	1.17804	0.0596867
1882	MSMEG_1950	conserved hypothetical protein	1.07558	0.834992
1883	MSMEG_1951	conserved domain protein	0.6141	0.0933754
1884	MSMEG_1952	ATP-dependent DNA helicase	0.924347	0.702396
1885	MSMEG_1953	transcription factor WhiB	1.02404	0.95948
1886	MSMEG_1954	ABC1 family protein	0.667394	0.0802792
1887	MSMEG_1955	conserved hypothetical protein	1.31927	0.602548
1888	MSMEG_1956	hypothetical protein	0.855008	0.239964
1889	MSMEG_1957	conserved hypothetical protein	0.900308	0.3897
1890	MSMEG_1958	PDZ domain family protein	1.07815	0.712729
1891	MSMEG_1959	putative membrane protein	1.41614	0.43972
1892	MSMEG_1960	hypothetical protein	1.29857	0.262676
1893	MSMEG_1961	conserved hypothetical protein	1.49277	0.46845
1894	MSMEG_1962	hypothetical protein	0.953102	0.829341
1895	MSMEG_1963	putative transcriptional regulatory protein	0.830803	0.329599
1896	MSMEG_1964	mitomycin radical oxidase	1.2709	0.546251
1897	MSMEG_1966	hypothetical protein	0.53744	0.0443616
1898	MSMEG_1967	TetR-family protein transcriptional regulator	0.921288	0.778254
1899	MSMEG_1968	putative oxidoreductase	1.39285	0.243718
1900	MSMEG_1969	MerR-family protein transcriptional regulator	0.967376	0.925837
1901	MSMEG_1970	sigma factor	0.531983	0.0287761
1902	MSMEG_1971	propane monooxygenase hydroxylase large subunit	1.73187	0.388046
1903	MSMEG_1972	methane monooxygenase component C	1.90032	0.0120891
1904	MSMEG_1973	propane monooxygenase hydroxylase small subunit; this gene contains a frame shift which is not the result of sequencing error	1.12617	0.618363
1905	MSMEG_1973	propane monooxygenase hydroxylase small subunit; this gene contains a frame shift which is not the result of sequencing error	1.68226	0.315536
1906	MSMEG_1974	propane monooxygenase coupling protein	1.20392	0.391456
[truncated: 4,898 more rows]
